# Supplementary material for: Qualitative protocol for understanding the contribution of Australian policy in the urban planning, justice, energy and environment sectors to promoting health and health equity
Source: PubMed Central journal article supplement — BMJ Open. 2018 Oct 4;8(9):e025358. doi: 10.1136/bmjopen-2018-025358 (PMC6173260; doi:10.1136/bmjopen-2018-025358), 2018-10-04
Supplement: bmjopen-2018-025358.draft_revisions.pdf [file bmjopen-2018-025358.draft_revisions.pdf]

# BMJ Open

BMJ Open is committed to open peer review. As part of this commitment we make the peer review history of every article we publish publicly available.

When an article is published we post the peer reviewers' comments and the authors' responses online. We also post the versions of the paper that were used during peer review. These are the versions that the peer review comments apply to.

The versions of the paper that follow are the versions that were submitted during the peer review process. They are not the versions of record or the final published versions. They should not be cited or distributed as the published version of this manuscript.

BMJ Open is an open access journal and the full, final, typeset and author-corrected version of record of the manuscript is available on our site with no access controls, subscription charges or pay-per-view fees (<http://bmjopen.bmj.com>).

If you have any questions on BMJ Open's open peer review process please email [info.bmjopen@bmj.com](mailto:info.bmjopen@bmj.com)

# BMJ Open

## A qualitative protocol for understanding the contribution of Australian policy in the urban planning, justice, energy and environment sectors to promoting health and health equity

|                               |                                                                                                                                                                                                                                                                                                                                                                                                                                                                                                      |
|-------------------------------|------------------------------------------------------------------------------------------------------------------------------------------------------------------------------------------------------------------------------------------------------------------------------------------------------------------------------------------------------------------------------------------------------------------------------------------------------------------------------------------------------|
| Journal:                      | <i>BMJ Open</i>                                                                                                                                                                                                                                                                                                                                                                                                                                                                                      |
| Manuscript ID                 | bmjopen-2018-025358                                                                                                                                                                                                                                                                                                                                                                                                                                                                                  |
| Article Type:                 | Protocol                                                                                                                                                                                                                                                                                                                                                                                                                                                                                             |
| Date Submitted by the Author: | 16-Jul-2018                                                                                                                                                                                                                                                                                                                                                                                                                                                                                          |
| Complete List of Authors:     | Baum, Fran; Flinders University, Southgate Institute for Health, Society and Equity<br>Delany-Crowe, Toni; Flinders Univ S Australia, Southgate Institute<br>Fisher, Matthew; Southgate Institute for Health, Society and Equity, Flinders University<br>Macdougall, C; Flinders University<br>Harris, Patrick; University of Sydney, Menzies Centre for Health Policy<br>McDermott, Dennis; Flinders University, Poche Centre<br>Marinova, Dora; Curtin University, Sustainability Policy Institute |
| Keywords:                     | PUBLIC HEALTH, QUALITATIVE RESEARCH, Health policy < HEALTH SERVICES ADMINISTRATION & MANAGEMENT                                                                                                                                                                                                                                                                                                                                                                                                     |
|                               |                                                                                                                                                                                                                                                                                                                                                                                                                                                                                                      |

SCHOLARONE™  
Manuscripts

Peer Review Only

# Title page

## Title of paper

A qualitative protocol for understanding the contribution of Australian policy in the urban planning, justice, energy and environment sectors to promoting health and health equity

## Authors

Professor Fran Baum, Southgate Institute for Health, Society and Equity, Flinders University [fran.baum@flinders.edu.au](mailto:fran.baum@flinders.edu.au)

Dr Toni Delany-Crowe, (**Corresponding author**) Southgate Institute for Health, Society and Equity, Flinders University [toni.delanycrowe@flinders.edu.au](mailto:toni.delanycrowe@flinders.edu.au)

Dr Matthew Fisher, Southgate Institute for Health, Society and Equity, Flinders University [matt.fisher@flinders.edu.au](mailto:matt.fisher@flinders.edu.au)

Professor Colin MacDougall, Southgate Institute for Health, Society and Equity, Flinders University [colin.macdougall@flinders.edu.au](mailto:colin.macdougall@flinders.edu.au)

Dr Patrick Harris, Menzies Centre for Health Policy, University of Sydney [patrick.harris@sydney.edu.au](mailto:patrick.harris@sydney.edu.au)

Professor Dennis McDermott, Poche Centre for Indigenous Health & Wellbeing, Flinders University, [dennis.mcdermott@flinders.edu.au](mailto:dennis.mcdermott@flinders.edu.au)

Professor Dora Marinova, Sustainability Policy Institute, Curtin University, [D.Marinova@curtin.edu.au](mailto:D.Marinova@curtin.edu.au)

## Author Contributions

FB and MF led the development and writing of the original grant application. FB, MF, CM, PH, DMcD and DM contributed to the conception and design of the research. All authors collaborated to determine the processes for data collection, analysis and dissemination. All authors reviewed and made critical comments on drafts of the original grant application.

After the funding was awarded, FB, TDC and CM led development, testing and refinement of the coding framework and associated data analysis processes, with intellectual input from MF, PH, DMcD and DM. TDC led development of this manuscript with critical review provided by all other authors. All authors approved the final version of this manuscript and are prepared to take responsibility for the content.

### Acknowledgments

Professor Margaret Whitehead, Professor Peter Sainsbury, Ms Carmel Williams, Dr Anthea Krieg and Associate Professor Lester Wright are partner investigators on the research project. All have advised on the research design, guided the conduct of the research and contributed sectoral based expertise.

Dr Michael McGreevy and Ms Emily Riley are employed as researchers on this project, and have key roles in data collection and analysis. Dr Michael McGreevy provided research assistance to support development of an early draft of this manuscript by reorganising and reformatting sections of the original grant application.

## Main document

### Abstract

**Introduction:** A well-established body of literature demonstrates that health and equity are strongly influenced by the consequences of governments' policy and resultant actions (or inactions) outside the health sector. Consequently, the United Nations, and its agency the World Health Organisation, have called for national leadership and whole-of-government action to understand and address the health impacts of policies in *all* sectors. This research responds to that call by investigating how policy making in four sectors- urban planning, justice, energy and environment- may influence the social determinants of health and health equity (SDH/HE).

**Methods and analysis:** The research design is informed by a critical qualitative approach. Three successive stages are included in the design. The first involves analysing all strategic policy documents and selected legislative documents from the four sectors (n=583). The document analysis is based on a coding framework developed to identify alignment between the documents and the SDH/HE. Two policies that demonstrate good practice in regard to SDH/HE will be selected from each sector during the second stage for embedded case study analysis (total n=8). This is intended to illuminate which factors have supported recognition and action on SDH/HE in the selected policies. The third stage

1 involves progressive theoretical integration and development to understand political and  
2 institutional facilitators and barriers to action on SDH/HE, both within and between sectors.

3 **Ethics and dissemination:** The research will provide much needed evidence about how  
4 coherent whole-of-government action on SDH/HE can be advanced and contribute  
5 knowledge about how health-enhancing policy activity in the four sectors may be optimised.  
6 Learnings from the research will be shared via a project advisory group, policy briefings,  
7 academic papers, conference presentations and research symposia. Ethics approval has  
8 been secured for the embedded case studies, which involve research participants.

### 9 10 **Strengths and limitations of this study**

- 11 • A census of all relevant policies will be analysed, allowing a comprehensive view of  
12 the policy landscape across and within the four sectors.
- 13 • Data collection is bounded by set time periods so will not include new documents as  
14 they are released.
- 15 • The embedded case studies focus on examples of good practice, facilitating learning  
16 about how strong policy can be developed to improve health and equity.
- 17 • The design of the study will not allow direct evaluation of the population health  
18 impacts of policy interventions, instead causal links between policy implementation  
19 and improvements in health will be theorised.

### 20 21 **Introduction**

22 Life expectancies have been increasing globally over the last century. Despite some  
23 setbacks, including the HIV/AIDS crisis in Africa, people are generally living much longer  
24 than they did a century ago. The benefits of this increase in life expectancy, however, are  
25 not evenly shared, neither internationally nor within countries [1].

26  
27 Australia is one of the best performers. On average, life expectancy has increased by 25  
28 years over the last century [2]. In Australia, males born between 2013 and 2015 are  
29 expected to live to the age of 80.4 years and females born in this period are expected to  
30 live to 84.5 years [3]. Significant gaps remain, however, between the health status of  
31 population groups in Australia based on income, education, employment status, rurality,  
32 gender and ethnicity. In particular, Aboriginal and Torres Strait Islanders have an average  
33 life expectancy approximately ten years below the national average [3], and experience

1  
2  
3 1 higher levels of chronic disease [4]. Social changes, represented in health risks such as the  
4 2 obesity epidemic [5], and increasing economic inequities, also present new threats to  
5 3 Australians' health and may undermine past gains in regard to rates of morbidity and  
6 4 mortality, as well as population wellbeing overall. Given the existence of such threats, along  
7 5 with enduring, unfair differences in health status between population groups, a continued  
8 6 research focus on ways to optimise the health of Australians is vital. The Australian  
9 7 Research Council funded project that is outlined in this paper will contribute knowledge  
10 8 about how health may be improved by actions across *multiple* policy sectors. It builds on  
11 9 previous research examining action on the social determinants of health and health equity  
12 10 within policies from Australian health departments only [6-8].  
13  
14  
15  
16  
17  
18  
19  
20  
21

### 22 **The social determinants of health and health equity (SDH/HE)**

23 Evidence shows that individual and population health are strongly influenced by the  
24 14 socioeconomic and cultural environments in which people live and work in all countries [1,  
25 15 9]. It is apparent that differences in daily living conditions contribute significantly to  
26 16 inequalities in health outcomes within and between countries [10-12]. The circumstances of  
27 17 daily life that influence and shape the distribution of socioeconomic and cultural resources  
28 18 are now widely recognised in research and policy as *social determinants of health* (SDH) [1,  
29 19 13-15]. Furthermore, health inequalities caused by *avoidable* and *unfair* socioeconomic  
30 20 and/or cultural inequalities are recognised as *health inequities* (HE) [16]. Effective action on  
31 21 SDH/HE in policy could produce significant savings in public expenditure and improve  
32 22 productivity. In Australia, a study found that through such action "500,000 Australians could  
33 23 avoid suffering a chronic illness; 170,000 extra Australians could enter the  
34 24 workforce,...[and] annual savings of \$4 billion in welfare support payments could be made"  
35 25 [17].  
36  
37  
38  
39  
40  
41  
42  
43  
44  
45

### 46 **Policy and SDH/HE**

47 28 The evidence on SDH/HE shows that health and health equity can be maintained,  
48 29 worsened or improved by government policy actions (or inactions) both within and outside  
49 30 of the health sector. Effective whole-of-government action on SDH/HE relies, in part, on  
50 31 *cross-sectoral* collaboration between the public agencies responsible for different areas of  
51 32 government policy [4, 18]. Sustained whole-of-government action to address SDH/HE,  
52 33 however, remains elusive in many countries, including Australia [19-22]. Furthermore,  
53  
54  
55  
56  
57  
58  
59  
60

1  
2  
3 1 cross-sectoral strategies in Australian health policy, are predominantly focused on medical  
4 2 care and individualised health promotion, rather than on addressing SDH/HE [8]. As a  
5 3 result, it is clear that current health research requires a broader scope; allowing it to extend  
6 4 beyond the health sector and beyond cross-sectoral work driven by the health sector.  
7  
8  
9

10 5  
11 6 Adding further impetus to this research agenda, the United Nations [13] and its agency the  
12 7 World Health Organisation (WHO) [23], have called for national leadership to understand  
13 8 and address the health effects of policies in *all* sectors. In 2013 an Australian Senate  
14 9 inquiry into Australia's national response to the WHO Commission on Social Determinants  
15 10 of Health [1] recommended consideration of SDH/HE in *all* relevant policy development  
16 11 activities [24].  
17  
18  
19

20 12  
21 13 The research study described in this paper is responding to such calls by devising robust  
22 14 means to analyse how government policies in sectors other than health contribute to  
23 15 wellbeing and health equity. This will be achieved through an examination of how policy and  
24 16 policy making in four Australian policy sectors that do not frequently feature as partners in  
25 17 cross-sectoral health policies to address SDH/HE [25], may facilitate or obstruct action on  
26 18 SDH/HE. The four sectors are urban (land-use) planning, justice, energy and environment.  
27  
28  
29  
30  
31  
32  
33

## 34 20 **Interactions between policy areas**

35 21 There has been no systematic research in Australia to investigate how policy in the urban  
36 22 planning, justice, energy and environment sectors proposes action on SDH/HE; or how the  
37 23 institutional norms and values expressed in the policies of these sectors facilitate or  
38 24 obstruct such action. Policy settings in each of the sectors are, however, likely to have  
39 25 significant positive or negative effects on health and/or health inequities by affecting known  
40 26 SDH/HE in many areas. These areas include incarceration [26], design of urban form and  
41 27 housing security [27], adaptation to climate change [28], and the shaping of the energy and  
42 28 employment markets [29]. Policy settings in each sector may also affect SDH/HE through  
43 29 interaction with those in another area; for example, housing for people exiting prison [26], or  
44 30 low-carbon jobs training opportunities for Aboriginal and Torres Strait Islanders [30].  
45  
46  
47  
48  
49  
50  
51  
52

53 32 In each sector, policies have particular implications for Indigenous Australians' health [31-  
54 33 33]. For example, the adverse health effects arising from the high rates of incarceration of  
55  
56  
57  
58  
59  
60

1  
2  
3 1 Aboriginal and Torres Strait Islander people, occurring under justice sector policies, are  
4 2 likely to undermine health gains achieved elsewhere [31]. Similarly, improving the health of  
5 3 Aboriginal and Torres Strait Islander people through work on the SDH/HE will have flow-on  
6 4 effects in furthering progress towards the goals of the health sector, but also in addressing  
7 5 the underlying determinants of incarceration [26, 34, 35], thereby reducing pressure on the  
8 6 criminal justice system. Acknowledging such interconnections between policy sectors,  
9 7 including the potential breadth of flow-on effects, highlights the importance of the current  
10 8 research study.

## 9 **Research aims**

10 The aims of the study are as follows.

- 11 1. Advance knowledge of the extent to which Australian federal and state/territory  
12 2 governments' policies in the justice, urban planning, environment and energy  
13 3 sectors recognise evidence and propose action on SDH/HE, in ways that are  
14 4 likely to improve health or reduce health inequities.
- 15 2. Identify opportunities for, and barriers to, improved action on SDH/HE within the  
16 3 policy positions of the selected sectors, including in relation to collaboration with  
17 4 other sectors.
- 18 3. Advance understanding of factors leading to incorporation of actions on SDH/HE  
19 4 in policy development, in each selected sector, and across sectors.
- 20 4. Understand how policy in each of the selected sectors disposes them to action on  
21 5 social determinants to improve the health of Indigenous Australians.
- 22 5. Understand how political values and institutional norms (including those driven by  
23 6 neoliberalism) shaping policy in the selected sectors affect prospects for  
24 7 improved cross-sectoral action, or whole-of-government action, on SDH/HE in  
25 8 Australia.

## 26 **Methods and analysis**

### 27 **Assumptions informing the research design**

28 The design of the research is premised on the view that Australian governments can and  
29 30 should follow UN and WHO advice and ensure that policies in all sectors, according to their  
31 32 particular responsibilities, address SDH/HE in ways that are likely to support good health,  
33 34 and avoid adverse effects on health. The research draws upon the report and  
35 36 recommendations of the Commission on the Social Determinants of Health in envisaging  
37 38  
39 40  
41 42  
43 44  
45 46  
47 48  
49 50  
51 52  
53 54  
55 56  
57 58  
59 60



1  
2  
3 1 how all four sectors can seek to ensure, as far as possible, that their policy actions create  
4 2 conditions conducive to health and health equity [1]. The research design also adopts the  
5 3 theoretical stance that historically accumulated political and policy values, norms and  
6 4 practices within government agencies (as institutions) are likely to significantly shape their  
7 5 dispositions (positive or negative) toward engagement in such efforts [36].  
8  
9  
10

### 11 **Critical inquiry**

12 6 Critical theory underpins the research design. The broad intent is to understand existing  
13 7 social systems (especially politics and bureaucracies), and examine their impacts while also  
14 8 assisting in the development of strategies for practical social change. The task of a critical  
15 9 researcher is to examine and deconstruct particular understandings of the world to show  
16 10 how they are produced and what the implications of their production are [37]. Therefore,  
17 11 undertaking critical inquiry involves examining how social circumstances are mediated by  
18 12 dynamics of power and how they manifest within, and serve to reinforce, various  
19 13 interrelated sources of inequity, such as those formed on the basis of socioeconomic  
20 14 positioning [38]. Within this approach policy is considered a key vehicle for the transmission  
21 15 of power. Examining policy through a critical theory lens in this research involves  
22 16 deconstructing the content of policy documents, interrogating the systems that produced  
23 17 that content, and applying theory to produce new understandings. The understandings are  
24 18 focussed on questions of what realities are produced through policy, why policies are  
25 19 shaped in a given way and to what effect, while reimagining how the application of different  
26 20 policy framings may create different, fairer, healthier social conditions.  
27  
28  
29  
30  
31  
32  
33  
34  
35  
36  
37

### 38 **Qualitative inquiry**

39 22 A qualitative approach was selected because it facilitates the development of detailed,  
40 23 integrative analyses of the processes and impacts under investigation [39]. Detailed  
41 24 analysis and explanation is vital to understand the complexity of policies and the systems  
42 25 that produce them. Qualitative analysis also seeks to uncover the meanings and  
43 26 understandings applied by policy actors directly involved in developing and implementing  
44 27 policy [39], which is helpful in allowing examination of their experiences and ideas.  
45  
46  
47  
48  
49

### 50 **Concepts central to contemporary public health that will be explored in the research**

51 30 Two of the key concepts that have been shown to be central in contemporary public health  
52 31 debates - neoliberalism and lifestyle drift - will be considered during the research. This  
53 32 section presents an overview of the conceptual relevance of neoliberalism to the sectoral  
54 33  
55  
56  
57  
58  
59  
60

1 norms and values that are under examination in this study, and explains its potential to  
2 stimulate drift within policies, to which the researchers must remain attentive throughout the  
3 study.

#### 4 **Neoliberalism as an institutional norm, and its relevance to the research**

5 Within public health there is a tension between structure and agency. This stems from the  
6 question of what matters more in shaping life circumstances: the influence of individual's  
7 behaviour and choices, or the influence of the social environments in which individuals live?  
8 [40]. The structure/agency debate has intensified with the rise of neoliberalism in  
9 contemporary societies [41]. Governments influenced by neoliberal ideas (which, arguably,  
10 includes all current governments in Australia) focus on facilitating competitive free markets,  
11 privatisation and reducing regulatory controls on market activity in the belief that these will  
12 stimulate individual enterprise and economic growth [41, 42]. Given this focus, there is a  
13 shift away from the belief that governments have the obligation to take responsibility for  
14 society, and to protect the wellbeing of individuals. This belief is being eroded during the  
15 transition towards a model where individuals are regarded as having the power and  
16 obligation to take responsibility for themselves, in the quest to become self-reliant [43, 44].  
17 This stance disposes governments to favour understandings of the origins of health and ill  
18 health that focus on individualised behaviour and biomedical (rather than social) factors [44,  
19 45]. It also encourages governments to reject their responsibility to care for citizens by  
20 creating health promoting social and economic environments [46].

21  
22 During the study we explore the extent to which policy values and institutional norms in the  
23 four sectors reflect neoliberal values. If there are instances where neoliberal values are not  
24 reflected, and there instead appears to be genuine government commitment to improving  
25 the structural conditions of society in order to address SDH/HE we examine how this has  
26 come about. Such investigation is useful in learning about ways governments may resist  
27 neoliberal ideals in order to pursue policies for broad social (rather than only economic)  
28 progress and wellbeing.

#### 29 30 **Examining 'drift'**

31 Given the pervasive influence of neoliberalism in Australia [41] it is vital for this research to  
32 investigate whether the adoption of socio-structural or individualised views of problems and  
33 solutions are influencing policy in the four sectors in ways that facilitate or obstruct policy

1  
2  
3 1 action on SDH/HE. Research on health policy has found that contemporary policies often  
4 2 make rhetorical acknowledgement of evidence on the social, economic or cultural factors  
5 3 affecting health, but nevertheless propose strategies predominantly focused on treating  
6 4 individual illness, or motivating individuals to improve health behaviours [47-49]; a  
7 5 phenomenon labelled as 'lifestyle drift' [48]. Theoretical perspectives on health policy  
8 6 suggests that such 'drift' may occur in part because of political incentives for governments  
9 7 in neoliberal societies to couch health problems and propose solutions in predominantly  
10 8 individualised terms; thereby avoiding the 'need' to contemplate politically sensitive  
11 9 changes to existing socioeconomic or cultural conditions that challenge powerful interests  
12 10 [50, 51]. Evidence supports these views, showing that governments are sometimes subject  
13 11 to political pressures from interest groups to frame health policy in individualised terms [52,  
14 12 53]. Our research strategy is designed to enable us to document the extent to which  
15 13 neoliberalism and lifestyle drift have influenced the policies and policy making processes  
16 14 under investigation. Hence, as described next, we are utilising document analysis to ensure  
17 15 particularly careful scrutiny of the policy documents, and through this scrutiny draw out  
18 16 important policy silences (or vital areas not addressed in the policies) that are related to  
19 17 relevant aspects of SDH/HE.  
20 18

### 19 **Design of the study**

20 As explained earlier the research is focussed on four sectors: urban planning, justice,  
21 energy and environment. These sectors form the primary case studies for the research, as  
22 shown in Figure 1.  
23

### 24 **Figure 1 Overview of the research design**

25 Insert Figure 1 here  
26

27 The four sectors were selected following a rapid desktop review of departments and  
28 agencies in all Australian jurisdictions (federal and state/territory governments) to identify  
29 policy sectors with the following characteristics:

- 30 a) sectors that are not typically regarded as health or human service sectors and  
31 which are, therefore, not usually regarded as having responsibility to promote  
32 population health and equity;
- 33 b) sectors that nevertheless control areas of policy that evidence shows to

- 1  
2  
3 1 influence SDH/HE, including in relation to Indigenous health;  
4 2 c) sectors that match the skills and experiences of the investigators; and  
5 3 d) sectors that have discrete agencies responsible for the relevant areas of policy  
6 4 within all Australian government jurisdictions.  
7  
8  
9  
10

11 6 To provide clarity about what areas each sector covered, further desktop analysis was  
12 7 conducted across all governments in all jurisdictions. This resulted in us defining each  
13 8 sectoral area in the following ways.

- 14 9 1. **Urban planning** – incorporating focus on planning, infrastructure, transport and  
15 10 essential services;  
16 11 2. **Justice** – incorporating focus on Attorney General functions, courts, policing and  
17 12 corrections;  
18 13 3. **Energy**– incorporating focus on all aspects of energy systems, including generation,  
19 14 network management, retailing, employment, mining, resources and renewal; and  
20 15 4. **Environment** – incorporating policy on environmental protection, natural resources and  
21 16 land management.  
22  
23  
24  
25  
26  
27  
28  
29

30 18 All current policy documents from each sector have already been collected. Collecting a  
31 19 ‘census’ of policies is enabling us to sketch the landscape in each sector across each  
32 20 jurisdiction in Australia to understand policy activity in each of the four sectors, and to  
33 21 question how it is orientated to work on the SDH/HE. From the census, examples of policies  
34 22 that showcase good practice on SDH/HE are being identified. Two such policies from each  
35 23 sector will be selected as embedded case studies. As explained by Yin [54], embedded  
36 24 case studies allow researchers to study multiple sub-units of analysis within a broader case.  
37 25 The advantage of this is that researchers can focus on instances of a broader phenomenon  
38 26 and study those instances in detail to derive deep understandings that may not be possible  
39 27 from the study of an overall case as a broader whole. Analysing a case, as well as sub-  
40 28 units of that case, allows researchers to generate a more comprehensive view, which  
41 29 assists in adequately addressing the ‘how’ and ‘why’ questions that drive case study  
42 30 research [54].  
43  
44  
45  
46  
47  
48  
49  
50  
51  
52

53 32 Within this research, studying the embedded case studies will allow us to generate  
54 33 explanations about why particular policies did consider SDH/HE and, crucially, to illuminate  
55 34 the conditions surrounding this inclusion. The census approach to studying each sector and  
56  
57  
58  
59  
60

1  
2  
3 1 the embedded case study research is being undertaken during successive stages, as  
4 2 shown in Figure 2.  
5

6 3

#### 7 4 **Figure 2 Successive stages of the research**

9 5 Insert Figure 2 here  
10

11 6

12 7 Each of the three stages shown in Figure 2 is explained in detail next. At the time of writing  
13 8 this paper, Stage 1 of the research had already commenced, and the tense changes within  
14 9 the paper between present and future tense reflect this.  
15  
16  
17 10

#### 18 11 **Stage 1- Document analysis of a census of policy documents and selected** 19 12 **legislation from the four sectors**

20 13 Qualitative document analysis provides a systematic procedure for reviewing and  
21 14 evaluating documents. Like other qualitative methods, document analysis requires data to  
22 15 be examined and interpreted by researchers to elicit meaning and develop understanding  
23 16 about what is present and not present in the data, and to what effect [55, 56]. Document  
24 17 analysis involves coding, synthesising and theorising research data to develop empirical  
25 18 knowledge about a subject area [55, 56]. The first step involves collecting the necessary  
26 19 documents [57].  
27  
28  
29  
30  
31  
32 20

33  
34 21 Data sets of all current, strategic policy and selected legislative documents from each of the  
35 22 four sectors across the nine Australian governments (all state and territory governments,  
36 23 and the federal government) have been compiled. To be considered strategic policy, the  
37 24 documents needed to include the goals, objectives and strategies of a relevant department  
38 25 in regard to a specific area of policy responsibility. This criterion excludes documents such  
39 26 as operational guidelines and technical descriptions of sectoral processes. Legislation was  
40 27 only included in instances where it addressed an area of sectoral responsibility for which  
41 28 there was no strategic policy. The data collection process garnered 583 documents across  
42 29 the four sectors (108 from urban planning, 165 from justice, 132 from energy and 178 from  
43 30 environment).  
44  
45  
46  
47  
48  
49 31

50  
51  
52 32 The document analysis is employing a detailed coding framework and NVivo 11 software is  
53 33 being used to undertake the analysis. Table 1 summarises the coding framework. During  
54 34 the qualitative document analysis process, each document is read at least twice by one  
55  
56  
57  
58  
59  
60

1 member of the research team. The first reading familiarises the researcher with the  
2 document structure and the topics covered. The second closer reading facilitates the coding  
3 of the content of each document according to pre-defined categories in the coding  
4 framework (see Table 1). During the coding process the framing of the document goals,  
5 objectives, strategies, and values articulated throughout the document are assessed to  
6 determine how and whether these align with our adopted frameworks for understanding  
7 optimal policy action on SDH/HE in Australia.

8  
9 Following the coding process, a document summary is written to explain whether (and if so  
10 how) the content of each policy aligns with the coding framework, to identify the main  
11 themes in the document and to highlight the dominant focus being applied (for example a  
12 neoliberal focus on economic gains, a focus on structural change, or an emphasis on the  
13 need to modify the behaviours of individuals etc.). After all documents in a jurisdiction  
14 (federal, state/territory) have been coded for each sector, a jurisdiction summary is then  
15 written, highlighting the key themes and policy intent across the jurisdiction. In both the  
16 document and jurisdiction summaries silences are identified where no aspect of the  
17 document can be coded into a particular category within the framework. Additionally,  
18 silences are being identified when the strategic intent of the objectives and/or proposed  
19 strategies of the document do not align with the stated goals, leaving some aspects either  
20 completely or partially ignored within the proposed actions. It is at this stage that lifestyle  
21 drift is being identified through reflection on instances within policy documents where the  
22 goals of the policy recognise or express an apparent intent to address SDH/HE, but this is  
23 not followed through in the proposed strategies, with an emphasis instead on strategies to  
24 change individual behaviour.

25  
26 The coding results and document summaries are peer reviewed during research team  
27 meetings. The team meetings are held fortnightly, and are conducted on a sector based  
28 rotation, so that each sector is discussed among the investigators and project staff at least  
29 once every two months. Periodically a meeting on all sectors is held to discuss the  
30 intersections between the findings that are emerging across the sectors.

31  
32 During team discussions, the analytical approach of Bacchi [58, 59] is being applied to  
33 question how the framing of the documents may influence policy development and  
34 implementation, and how responses to defined problems would differ if the intent and goals



1 articulated in the documents were framed differently. In addition, Whitehead's [60] typology  
 2 of actions is also being utilised to examine the theory of change that underlies the intent of  
 3 each policy (i.e. questioning if the intent is to strengthen individuals, strengthen  
 4 communities, improve living and working conditions or address socio-economic inequities).

6 **Table 1: Coding framework being applied during Stage 1 of the project**

| Coding focus                                                                                                                                                                                                                                                                                                                                                                                                                                                                                                                           | Nodes/categories                                                                                                                                                                                                                                                                                                                                                                                                                  | Explanation                                                                                                                                                                                                                                                                                                                                                                                                                                                                                                                                                                                                                                                                                                                                                                                                                                                                                                                                                                                                                          |
|----------------------------------------------------------------------------------------------------------------------------------------------------------------------------------------------------------------------------------------------------------------------------------------------------------------------------------------------------------------------------------------------------------------------------------------------------------------------------------------------------------------------------------------|-----------------------------------------------------------------------------------------------------------------------------------------------------------------------------------------------------------------------------------------------------------------------------------------------------------------------------------------------------------------------------------------------------------------------------------|--------------------------------------------------------------------------------------------------------------------------------------------------------------------------------------------------------------------------------------------------------------------------------------------------------------------------------------------------------------------------------------------------------------------------------------------------------------------------------------------------------------------------------------------------------------------------------------------------------------------------------------------------------------------------------------------------------------------------------------------------------------------------------------------------------------------------------------------------------------------------------------------------------------------------------------------------------------------------------------------------------------------------------------|
| <p data-bbox="99 539 776 573"><b>Framing of the discussion</b></p> <p data-bbox="99 604 776 888">The process for coding the framing of the document content is drawn from <i>What's the Problem Represented to be?</i> approach to policy analysis [58, 59]. All introductory sections of documents are coded to capture the perspectives being applied by the sector. Introductory sections are those that precede dedicated discussion of goals, strategies and objectives in the policy document, excluding the contents pages.</p> | <p data-bbox="781 539 1036 825">What is the problem represented to be?</p> <p data-bbox="781 831 1036 1077">What response is considered appropriate by the government?</p> <p data-bbox="781 1083 1036 1329">What else needs to be addressed?</p> <p data-bbox="781 1335 1036 1581">How does the sector understand the relationships between their work and health and equity?</p> <p data-bbox="781 1587 1036 1728">Strength</p> | <p data-bbox="1040 539 1422 825">Text that explicitly or implicitly demonstrates what the authors of the document consider to be the problem/issue that needs to be addressed by the particular policy document or Act that is being coded.</p> <p data-bbox="1040 831 1422 1077">Text that highlights what the government thinks is necessary to address the problem/issue identified above. I.e. What is the policy/Act designed to do?</p> <p data-bbox="1040 1083 1422 1329">Text that highlights what <i>else</i> the government considers to be problematic, even though these problems/issues may be outside the scope of the particular policy/Act being coded.</p> <p data-bbox="1040 1335 1422 1581">Text that highlights explicitly or implicitly how the authors of the document understand the connections between the work of their sector and the health and/or equity of the population.</p> <p data-bbox="1040 1587 1422 1728">What is identified by the government as an existing strength in the policy area.</p> |
| <p data-bbox="99 1734 776 1791">Determine the focus of the <b>goals, objectives and strategies</b> contained within the document</p> <p data-bbox="99 1822 776 1887">Definitions:<br/> <u>Goal</u>: Wording in the document describing what the</p>                                                                                                                                                                                                                                                                                    | <p data-bbox="781 1734 1036 1887">Relates generally to health</p>                                                                                                                                                                                                                                                                                                                                                                 | <p data-bbox="1040 1734 1422 1887">All goal/objective/strategy statements that are consistent with a general focus on health but that do not mention a specific SDH</p>                                                                                                                                                                                                                                                                                                                                                                                                                                                                                                                                                                                                                                                                                                                                                                                                                                                              |

| Coding focus                                                                                                                                                                                                                                                                                                                                                                                                                                                                                                                                                                                                                                                                                                                                                                                                                                                                                                                                                                                                                  | Nodes/categories                                                                                          | Explanation                                                                                                                                                                                                                                                                                                                                                                                                                                                                                                                             |
|-------------------------------------------------------------------------------------------------------------------------------------------------------------------------------------------------------------------------------------------------------------------------------------------------------------------------------------------------------------------------------------------------------------------------------------------------------------------------------------------------------------------------------------------------------------------------------------------------------------------------------------------------------------------------------------------------------------------------------------------------------------------------------------------------------------------------------------------------------------------------------------------------------------------------------------------------------------------------------------------------------------------------------|-----------------------------------------------------------------------------------------------------------|-----------------------------------------------------------------------------------------------------------------------------------------------------------------------------------------------------------------------------------------------------------------------------------------------------------------------------------------------------------------------------------------------------------------------------------------------------------------------------------------------------------------------------------------|
| <p>government wishes to achieve <i>overall</i>. [The ultimate desired outcome overall. Often phrased as broad statements]</p> <p><u>Objective</u>: Wording in the document that describes, more specifically, <i>a particular improvement</i> in performance that the government intends to achieve. [A more specific statement than a goal statement- it indicates what is desired for a particular aspect of activity]</p> <p><u>Strategy</u>: Wording describing a particular <i>action</i> that will be implemented within an area of government activity. [i.e. specific statements about what will be done]</p>                                                                                                                                                                                                                                                                                                                                                                                                         | <p></p> <p>Relates to a specific SDH</p> <p>Relates to equity</p> <p>Other</p>                            | <p>from the list shown in Box 1</p> <p>All goal/objective/strategy statements that include reference to a specific SDH from the list shown in Box 1</p> <p>All goal/objective/strategy statements that are consistent with a focus on narrowing avoidable and unfair gaps between groups (a levelling up approach to equity), or on making improvements across the gradient of advantage/disadvantage (a gradient approach to equity)</p> <p>Other goal/objective/strategy statements that are not related to health, equity or SDH</p> |
| <p><b>Value statements</b></p> <p>Value statements are coded where they are listed explicitly under sections titled 'values' or 'principles' as well as within other text where values appear more implicitly.</p> <p>Values are important because how an issue is framed in a policy, and what actions are considered appropriate, depends on the values, ideas and judgments made by the people involved, those that circulate within the sector within which the policy is being written and within the broader political and bureaucratic contexts surrounding the policy (current and historical). As such values, ideas and judgments become structuring forces within policy development - however, sometimes they are implicit and their role in structuring discussion is not obvious [61]. Since values shape how a policy is framed it is important to determine which values are being expressed both explicitly and implicitly, to understand how and why an issue is being represented in a particular way.</p> | <p>Relates generally to health</p> <p>Relates to a specific SDH</p> <p>Relates to equity</p> <p>Other</p> | <p>Value statement that reflects the importance of health in general</p> <p>Value statement that reflects the importance of a specific SDH listed in Box 1</p> <p>Value statements that reflect the importance of equity or fairness</p> <p>Other value statement that is not related to health, equity or a SDH</p>                                                                                                                                                                                                                    |
| <p><b>Evidence use to support claims</b></p> <p>Evidence use is determined through analysis of there being <u>citations</u> included in the documents.</p>                                                                                                                                                                                                                                                                                                                                                                                                                                                                                                                                                                                                                                                                                                                                                                                                                                                                    | <p>Evidence- health</p> <p>Evidence- SDH</p>                                                              | <p>The citation/evidence reflects an explicit focus on health</p> <p>The citation/evidence appears to reflect a focus on</p>                                                                                                                                                                                                                                                                                                                                                                                                            |



| Coding focus                                                                                                                                                                                                                                                                                                                                                                                                                                                                                                     | Nodes/categories                                                                                                                                  | Explanation                                                                                                                                                                                                                                                                                                                                                                                                                                                                                                                                                                                                                                                                                                                                      |
|------------------------------------------------------------------------------------------------------------------------------------------------------------------------------------------------------------------------------------------------------------------------------------------------------------------------------------------------------------------------------------------------------------------------------------------------------------------------------------------------------------------|---------------------------------------------------------------------------------------------------------------------------------------------------|--------------------------------------------------------------------------------------------------------------------------------------------------------------------------------------------------------------------------------------------------------------------------------------------------------------------------------------------------------------------------------------------------------------------------------------------------------------------------------------------------------------------------------------------------------------------------------------------------------------------------------------------------------------------------------------------------------------------------------------------------|
| <p>Instances in the document that explicitly refer to evidence use without a citation are also coded- such as "Evidence suggests that ...."</p> <p>In addition, where the title of a document is included in a sentence but no formal citation is included, this is still coded as evidence.</p> <p>Exclusions: Sweeping statements such as "It is well known that..." are not coded as reflecting evidence use if no formal citation or document reference is provided to support such sweeping statements.</p> | <p>Evidence- Equity</p> <p>Other evidence- Not related to health, equity or SDH</p>                                                               | <p>one of the SDH in Box 1</p> <p>The citation/evidence reflects a focus on equity (levelling up approach or gradient focus)</p> <p>Evidence is cited/referred to in the document but does not appear relevant to the focus of this research</p>                                                                                                                                                                                                                                                                                                                                                                                                                                                                                                 |
| <p><b>Policy intent</b></p> <p>Involves an assessment of policy intent drawing on Margaret Whitehead's typology [60]</p>                                                                                                                                                                                                                                                                                                                                                                                         | <p>Strengthen individuals</p> <p>Strengthen communities</p> <p>Improve living and working conditions</p> <p>Address socio-economic inequities</p> | <p>Statements that reflect the aim of strengthening individuals, using individually focussed strategies</p> <p>Statements that reflect the aim of strengthening communities through building social cohesion, capacity within communities, and mutual support between community members</p> <p>Statements that reflect the aim of changing the broader social and environmental conditions that people live and work in. This includes both social and physical environments, as well as the economic, cultural, political influences that shape those environments</p> <p>Statements that reflect an explicit intent to directly change the distribution of resources – rather than to provide once off alms or reactive band aid solutions</p> |
| <p><b>Collaboration</b></p> <p>Includes references to the importance of intersectoral, private sector, or community collaboration.</p>                                                                                                                                                                                                                                                                                                                                                                           | <p>Collaboration- Intersectoral</p>                                                                                                               | <p>References to the importance of collaborating within and across the departments/sectors of governments. Also includes statements about the importance of the different levels of government working</p>                                                                                                                                                                                                                                                                                                                                                                                                                                                                                                                                       |

| Coding focus                                                               | Nodes/categories                                                | Explanation                                                                                                                                                           |
|----------------------------------------------------------------------------|-----------------------------------------------------------------|-----------------------------------------------------------------------------------------------------------------------------------------------------------------------|
|                                                                            |                                                                 | together                                                                                                                                                              |
|                                                                            | Collaboration-Private sector involvement                        | References to the importance of collaborating with private sector organisations                                                                                       |
|                                                                            | Collaboration-Community involvement                             | References to the importance of involving/consulting with the community as a whole or sub-groups within the community                                                 |
| <b>Explicit references to key groups and concepts within the documents</b> | Mention of- Aboriginal Australians or Torres Straight Islanders | Any sentence where an explicit reference to Aboriginal Australians or Torres Straight Islanders appears is coded                                                      |
|                                                                            | Mention of- health word                                         | Any sentence where the following word/s is mentioned:<br>Health, wellbeing, fitness, fit, illness, disease, wellness, equity, inequity, equality, inequality is coded |
| <b>Mentions of other related documents</b>                                 | Policy document                                                 | All references to other policies are coded                                                                                                                            |
|                                                                            | Act                                                             | All references to other Acts/legislation are coded                                                                                                                    |
|                                                                            | Other related document                                          | All references to related documents that are mentioned in the policy/Act are coded (e.g. guides/handbooks etc.)                                                       |

1

2

3

### BOX 1: Social determinants of health

4 Segments of text are coded as referring to a social determinant when they reflect a

5 focus on any of the following:

- **Education** [1, 62, 63]
- **Food** [62, 64]
- **Health systems** [1, 62]
- **Housing** [excludes prisons] [62, 65]
- **Distribution of income** [1]

- **Stigma/discrimination** [based on race/ethnicity or other characteristics] [65]
- **Social relationships** [1, 62]
- **Social exclusion** [65]
- **Transport** [64]
- **Employment** [1, 65]
- **Welfare system** [65]
- **Land/country** [65]
- **Gender** [1]
- **Safety** [66]
- **Culture** [65]
- **Open space**
- **Natural environment** [28]
- **Built environment** [67]
- **Climate change** [28]

1

2

3

#### 4 **Stage 2-Embedded Case studies:**

5 The coding process will identify examples of policies that demonstrate good practice  
6 in addressing SDH/HE. Two such policies will be selected in each of the four  
7 selected sectors (n=8) as embedded case studies. The aim is to understand in  
8 greater depth the factors that enable consideration of SDH/HE during policy  
9 development and to assess whether implementation of the selected policies is  
10 inclusive of efforts that will progress SDH/HE. The embedded case studies will be  
11 framed by a critical realist evaluation approach.

12

13 Critical realist evaluation will allow us to engage beyond the question of whether a  
14 policy proposes work on the SDH/HE. We will examine *why* specific policies have  
15 incorporated SDH/HE, *what* circumstances and conditions made this possible, and  
16 *how* work on SDH/HE is being progressed during policy implementation [40]. If work  
17 on SDH/HE has not formed part of the implementation focus, we will examine what  
18 has impeded this [68], and question which institutional norms and factors, such as  
19 neoliberal values and lifestyle drift, have had an impact. Consistent with the broader  
20 aims of the study, selection of policies for the embedded case studies will include at  
21 least three policies that specifically address the health of Aboriginal and Torres Strait  
22 Islanders.

23

24 The embedded case study research will involve analysis of documents associated  
25 with each selected policy as well as key policy actor interviews. The interviews will  
26 be focussed on examining the factors that enabled SDH/HE to get onto each sector's

1  
2  
3 1 policy agenda, and on exploring whether implementation has incorporated actions  
4 2 that are likely to progress SDH/HE. The interview schedule will be informed by the  
5 3 work of Kingdon [69], Lewis [70], Bacchi [59], and Hall [71]. As such, the interviews  
6 4 are intended to elicit interviewees' views on the various institutional, political, or  
7 5 conceptual factors, and use of evidence, which influenced the focus and content of  
8 6 the policies, as well as their implementation. Interviewees' views on whether an  
9 7 individualised or social/structural perspective was adopted to define the problem/s to  
10 8 be addressed, or to shape the preferred policy 'solution' to be applied during policy  
11 9 development and implementation, will also be collected during the interviews.  
12  
13  
14  
15  
16  
17  
18

19 11 The processes for interviewee recruitment and case study data analysis are as  
20 12 follows. Senior executives within the departments that developed each selected  
21 13 policy will be consulted to identify a key contact person, who will be asked to assist  
22 14 with identifying a policy network for each case study [70]. Further key actors will be  
23 15 identified by snowball sampling as the embedded case studies progress [39, 55].  
24 16 Between eight and twelve key actors will be interviewed about each of the eight  
25 17 selected policies. They will be individuals who hold, or held at a relevant time, a  
26 18 senior position and have direct experience of the policy's development and/or  
27 19 implementation. This may include departmental staff, ministers or ministerial staff,  
28 20 and advisors from outside government. The policy actors (including politicians, public  
29 21 servants and civil society activists) will be asked to engage in a one hour semi-  
30 22 structured interview to explore their perspectives on the development and/or  
31 23 implementation of the policy, and to identify any documents that illuminate the  
32 24 political/policy context in which the policy has been developed and implemented.  
33 25 Data from the interviews and documents informing the case will be analysed  
34 26 (assisted by NVivo 11) with a coding structure designed to identify how specification  
35 27 of a policy problem, selection of policy options, political and institutional context, and  
36 28 recognition of evidence influenced the content of the policy, and specifically its  
37 29 consideration of SDH/HE during both policy development and implementation. A  
38 30 detailed interrogation of how the policy actors view the issue of lifestyle drift and the  
39 31 impact of neoliberalism on contemporary policy contexts will also form part of the  
40 32 analysis process.  
41  
42  
43  
44  
45  
46  
47  
48  
49  
50  
51  
52  
53  
54  
55  
56  
57  
58  
59  
60

### 1 **Stage 3 – Theoretical integration**

2 During Stage 3 social and political science theories will be used to illuminate the  
3 operation and implications of the problem definition processes [59], political interests  
4 [69] and institutional values and norms (including neoliberalism) [71, 72] that are  
5 identified during Stages 1 and 2. This will assist in identifying the political and  
6 institutional factors that facilitate, and present barriers to, action on SDH/HE within  
7 and between the selected sectors. With Stage 1 data, application of theory will assist  
8 in understanding whether or not each sector's policies, as a group, feature particular  
9 characteristic values, goals and/or problem conceptions, and in understanding how  
10 these may have delimited the objectives and strategies in ways which are favourable  
11 or unfavourable to action on SDH/HE. Application of theory to Stage 2 data will  
12 facilitate understanding about how policy development processes (involving ideas,  
13 structures and actors) are influenced by political and/or institutional factors, including  
14 tacit or explicit theories of the nature and causes of the policy problem to be  
15 addressed, and how this can best be achieved. Stage 3 will draw all the findings  
16 together, with a focus on understanding the themes that emerge consistently across  
17 all the four sectors, illuminating the various interconnections.

### 19 **Research governance**

20 As alluded to previously, the research is being undertaken by a team of researchers  
21 with a track record of working together, and within the sectors that have been  
22 selected as the primary case studies for this research. The chief investigators are a  
23 collaborative group of multi-disciplinary researchers led by a public health social  
24 science researcher (FB) and comprising expertise in political philosophy (MF),  
25 Indigenous health (DMcD), urban planning and public health (PH), healthy public  
26 policy (CM), and economics, political economy and sustainability (DM). Partner  
27 investigators bring expertise in the areas of urban planning, public health policy,  
28 justice sector structure, processes and impacts, bureaucratic governance,  
29 intersectoral collaboration, and environmental sustainability.

30  
31 Continuing regular meetings between the members of the research team throughout  
32 the study will be vital. The meetings include discussion of findings from the coding  
33 and also discussion of broader theoretical meaning. The project manager (TDC) is  
34 co-ordinating the meetings and the data collection and analysis processes.

1  
2  
3 1  
4 2 To avoid the emergence of group-think within the project team, and to provide  
5 3 valuable sectoral insights and encourage policy relevance and translation, a Project  
6 4 Policy Advisory Group (PPAG) has been formed. Invitees to this group have direct  
7 5 policy related knowledge and experience from the sectors being examined in this  
8 6 study. The group includes senior public servants from a number of jurisdictions, non-  
9 7 government organisations and academic institutions with a record of interest in  
10 8 public policy action on SDH/HE. It is envisaged that the PPAG will meet six monthly  
11 9 over the course of the project, and advise the research team on issues in the policy  
12 10 environment related to the research aims, as well as support dissemination of  
13 11 outputs. The research team will use the PPAG meetings to test the relevance and  
14 12 usefulness of the findings. A combination of informal dialogue, formal meetings,  
15 13 written policy briefings and organised policy symposia will also be used throughout  
16 14 all stages of the research to gain broader feedback and input on the meaning of the  
17 15 emerging findings.  
18 16

19 17 The intersectoral discussions that occur during the PPAG meetings, as well as the  
20 18 collective team meetings, will be essential in highlighting the interconnections  
21 19 between sectors and policy impacts, to ensure that each sector is not studied as a  
22 20 siloed entity. Interrogation of the interconnections between sectors will facilitate  
23 21 broader theorisation of the meaning and relevance of the findings during Stage 3 of  
24 22 the research.  
25 23

#### 24 **Patient and Public Involvement**

25 25 Due to the nature of the research, patients were not involved in the design of this  
26 26 study. However, findings will be disseminated to all study participants as described  
27 27 next.

#### 28 29 **Ethics and dissemination**

30 30 The research will provide policy-ready evidence on good practices on SDH/HE that  
31 31 is relevant to multiple sectors. Such evidence may be useful in influencing current  
32 32 policy development and implementation practices, increasing the likelihood that  
33 33 future policies will be more coherent, forming part of a whole-of-government

1  
2  
3 1 approach to reduce adverse health impacts, promote wellbeing and achieve  
4 2 beneficial flow-on effects in all sectors. A range of dissemination strategies will be  
5 3 used to ensure that learnings can be shared effectively with academic and policy  
6 4 audiences. These will include the regular sharing of findings during the PPAG  
7 5 meetings, the release of policy briefings to all jurisdictions (including direct  
8 6 dissemination to all interview participants), the publication of academic papers and  
9 7 conference presentations. An initial research symposium has already been held to  
10 8 share research plans and background information on this area. Another symposium  
11 9 will be held at the conclusion of the project to share findings. Ethics approval has  
12 10 already been secured to allow the embedded case study research to proceed.  
13 11 However, once policies from the justice sector have been selected, additional ethics  
14 12 clearance may be required to allow interviewing of departmental staff.

#### 13 14 Practical and operational issues

15 The focus on four sectors means that the research is inherently interdisciplinary.  
16 16 While this is a strength of the design, achieving true interdisciplinarity requires the  
17 17 researchers to deal with practical issues. For example, the researchers will need to  
18 18 review, understand and apply perspectives from the urban planning, justice, energy  
19 19 and environment sectors as well as from the field of public health. Journal publishing  
20 20 word limits, as well as the scope and disciplinary boundaries of journals, will make  
21 21 this task difficult. To overcome these issues, it is likely that publication efforts will be  
22 22 aimed at carefully selected journals with the appropriate scope and disciplinary  
23 23 focus. We plan to combine overviews of all findings with papers dealing more deeply  
24 24 with literature and research findings from each sector. Furthermore, the  
25 25 interdisciplinary research focus will require the researchers to engage with all policy  
26 26 departments that are connected to the four sectors across all nine jurisdictions of  
27 27 government (federal as well as all state/territory governments in Australia).

28  
29 29 Forming strong connections with policy actors on the PPAG will be central to this.  
30 30 However, not all departments are represented on the PPAG, so the researchers will  
31 31 need to devise strategies for connecting with the broader policy network in ways that  
32 32 satisfy the requirements of truly collaborative research, but that also ensure  
33 33 efficiency. One strategy will be forming relationships with policy staff in some  
34 34 relevant departments during the embedded case studies. Contact with a broader



1  
2  
3 1 policy network will also be ensured by the researchers consulting all relevant  
4 2 departments to seek feedback on the findings of Stage 1 via the policy briefings, and  
5 3 by inviting staff from all relevant departments to research forums that will be  
6 4 livestreamed to encourage broad geographical participation.  
7  
8  
9

10 5  
11 6 The research also involves considerable conceptual complexity. Complexity is  
12 7 associated, in particular, with the relevance of critiquing pervasive, dominant social  
13 8 ideologies that shape current norms and influence the subsequent definition of policy  
14 9 problems and appropriate responses. Articulating neoliberalism will not be easy  
15 10 because its influence on policy is likely to be far reaching and not always easily  
16 11 detectable in individual policy documents. The research team will establish and  
17 12 reflect on coding processes to understand the nuances and impacts of institutional  
18 13 factors, including neoliberalism. Thus researchers will record their reflections in the  
19 14 document and jurisdiction summaries during Stage 1 to broaden focus from the  
20 15 specific coding categories to thinking about the ideological orientations of each  
21 16 document, how policy problems are being framed and what the dominant focus in  
22 17 each document/sector is. Research team meetings include critical discussions about  
23 18 the ideological underpinning of the key findings that are emerging, allowing  
24 19 discussion about the relationships between key themes and the broader ideologies  
25 20 that permeate thinking and action in each sector and jurisdiction.  
26  
27  
28  
29  
30  
31  
32  
33  
34  
35

36 21  
37 22 Detecting lifestyle drift will be facilitated by the researchers comparing the goals,  
38 23 objectives and strategies articulated in each document, to determine the extent to  
39 24 which broad statements of intent to tackle SDH/E are either implemented, or instead  
40 25 diverted into actions focused on changing the behaviours of individuals.  
41  
42  
43  
44

45 26  
46 27 Researchers will be attentive to the concept of policy silences. The coding process  
47 28 will identify not only what content exists within the policies, but also stimulate thinking  
48 29 about alternative problem definitions and unaddressed aspects of policy topics.  
49 30 Examining silences will render visible how neoliberalism and lifestyle drift may be  
50 31 pushing policy in particular directions, while keeping alternative problem definitions  
51 32 off the policy agenda.  
52  
53  
54  
55

56  
57  
58  
59  
60 33



1  
2  
3 1 Importantly, advocates for healthy public policy have called for cross-sectoral action  
4 2 to harness the opportunities that arise from greater understanding of how  
5 3 interconnections between policy areas affect health and equity. Yet as alluded to  
6 4 earlier, most intersectoral action has been limited to extending health sector medical  
7 5 and behavioural programs into other social policy sectors [25]. This can intensify a  
8 6 narrow focus on individuals rather than populations, and avoid interventions  
9 7 designed to tackle SDH/HE. For example, cross-sectoral collaboration between the  
10 8 justice and health sectors has been shown to be limited to prisoner assessment and  
11 9 improving access to remedial health care for people already in prison [25]. The focus  
12 10 on assessment and health care for prisoners, while important, is unlikely to prevent  
13 11 incarceration or to address the underlying social, cultural and economic factors that  
14 12 perpetuate the cycle of incarceration. This research will, therefore, focus on making  
15 13 clear how policies in our selected sectors can, in their own right, act to both promote  
16 14 health and prevent threats to health thus tackling the social determinants at their  
17 15 roots. Our publications will engage with theory and use the advice of policy makers  
18 16 to recommend how our case study sectors could form partnerships with the health  
19 17 sector that do address the roots of SDH/HE and avoid lifestyle drift.

20  
21 18  
22 19 Ensuring rigour during the coding process is vital, particularly in light of the  
23 20 challenges associated with the project, such as the conceptual complexity of the  
24 21 research focus, the large number of policy documents and the need to distribute  
25 22 coding tasks between multiple researchers. Strategies to ensure rigour will include  
26 23 collaborative coding of policy documents to check consistency of approach, regular  
27 24 discussion of coding summaries to ensure appropriate depth of analysis, and regular  
28 25 meetings between coders to discuss areas of uncertainty and to develop mutually  
29 26 agreed solutions to coding difficulties. A detailed coding guide has already been  
30 27 developed by the research team and is in use. This guide directs the coders to follow  
31 28 a consistent approach to the analysis and reminds them of the areas they need to be  
32 29 attentive to. Importantly the guide defines the concepts used in the coding  
33 30 framework. The application of consistent understandings during the coding process  
34 31 is imperative to achieving a consistent and transparent analytical focus.

35  
36  
37  
38  
39  
40  
41  
42  
43  
44  
45  
46  
47  
48  
49  
50  
51  
52  
53  
54  
55  
56  
57  
58  
59  
60

### 33 **Limitations of the research**

1  
2  
3 1 While this research is important, and necessarily ambitious, some limitations are  
4 2 evident. As explained earlier, a strength of the research is that a census of all  
5 3 relevant policies will be included in the study. This will allow us to develop a  
6 4 comprehensive view of the policy landscape across and within the four sectors.  
7 5 Given that the policy landscape is so dynamic (reflecting its political roots), we are  
8 6 conscious that the landscape will be changing even as we conduct the research.  
9 7 Because data collection is bounded by set time periods we will not be able to include  
10 8 new documents as they are released, or as political events change policy direction.  
11 9 However, to ensure that the policy analysis is rigorous, and remains manageable, it  
12 10 is vital that we apply transparent, time bound criteria for document collection. This  
13 11 demonstrates, in action, the clash between the research world (in which detailed  
14 12 analysis takes time) and the policy world (which changes rapidly in the face of  
15 13 bureaucratic and political flux).

14  
15 15 The four sectors will be studied within a federated system. Australia has three levels  
16 16 of government: federal, state and territory, and local. Our focus is on policies from  
17 17 the first two levels. Local government has been excluded to ensure that the project  
18 18 scope remains manageable.

19  
20 20 Furthermore, the design of the study will not allow direct evaluation of the population  
21 21 health impacts of policy interventions. Instead, our ability to theorise causal links  
22 22 between policy implementation and improvements in SDH/HE will be based on our  
23 23 analysis of published literature.

## 24 25 **Summary of the research significance**

26 26 This research will develop and test a protocol that can be applied across all policy  
27 27 sectors to understand the potential impact of their proposed actions on SDH/HE. The  
28 28 research findings that are produced through this study will enhance Australia's  
29 29 knowledge base and research capability in understanding the crucial and complex  
30 30 intersections between public policy (divided into policy sectors carrying out different  
31 31 functions) and work to progress the SDH/HE. This is important since optimised,  
32 32 systemic action on SDH/HE has significant potential to reduce public spending in a

1  
2  
3 1 number of policy sectors, as well as to contribute to improved economic productivity  
4 and disease prevention [17].  
5  
6

7  
8 4 There has been significant, recent recognition in Australia's federal parliament of a  
9 need for more coherent action on SDH/HE across policy sectors and levels of  
10 government [24]; including specifically in relation to Aboriginal and Torres Strait  
11 Islander health [14, 73]. This research will provide evidence to policy makers about  
12 opportunities to improve the engagement of all policy sectors in ways that have the  
13 potential to reduce health costs and contribute to closing the health gap between  
14 Indigenous and non-Indigenous Australians. Overall, the research will provide much  
15 needed evidence on concrete ways in which coherent whole-of-government action  
16 on SDH/HE can be advanced in Australia to enhance wellbeing and address health  
17 inequities [74].  
18  
19  
20  
21  
22  
23  
24  
25

## 26 **Abbreviations**

27  
28 16 ARC- Australian Research Council

29 17 SDH/HE- Social determinants of health and health equity

30 18 WHO- World Health Organisation

31 19 OECD- Organisation for Economic Co-operation and Development

32 20 PPAG- Project Policy Advisory Group  
33  
34  
35  
36

## 37 **Declarations**

### 38 39 **Ethics approval and consent to participate**

40 23  
41 24 This research project has been approved by the Flinders University Social and  
42 Behavioural Research Ethics Committee (Project Number 7176).  
43  
44

### 45 **Competing interests**

46 26  
47 27 The authors declare that they have no competing interests.  
48

### 49 **Funding**

50 28  
51 29 This work is supported by the Australian Research Council (ARC) (Grant:  
52 DP160100244) between 2016 and 2019. The ARC has no role in data collection,  
53 analysis or interpretation. This protocol was peer-reviewed by the funding body prior  
54 to funding being awarded.  
55  
56  
57  
58  
59  
60

1

2

3

#### 4 **Figure legends**

5 Figure 1 presents an overview of the research design, showing how the Stage one  
6 document analysis leads to the Stage 2 embedded case studies.

7

8 Figure 2 shows the successive stages of the research, including the policy analysis, the  
9 embedded case studies and the process of theoretical integration.

10

11

12

13

14

15

16

17

18

19

20

21

22

23

24

25

26

27

28

29

30

31

32

33

34

35

36

37

38

39

40

41

42

43

44

45

46

47

48

49

50

51

52

53

54

55

56

57

58

59

60

## References

1. Commission on the Social Determinants of Health: **Closing the gap in a generation: Health equity through action on the social determinants of health**. Geneva: World Health Organization; 2008.
2. Australian Institute of Health and Welfare: **Australia's Health 2014**. Canberra: Australian Government, AIHW; 2014.
3. Australian Institute of Health and Welfare: **Life expectancy**; 2017.
4. Baum F: **The New Public Health (4th Edition)**, 3rd edn. Melbourne: Oxford University Press; 2015.
5. Australian Institute of Health and Welfare: **Australia's health 2010**. Canberra: Australian Government, Australian Institute of Health and Welfare; 2010.
6. Fisher M, Baum F, MacDougall C, Newman L, McDermott D: **To what extent do Australian health policy documents address social determinants of health and health equity?** . *Journal of Social Policy* 2016, **published online**.
7. Fisher M, Baum F, MacDougall C, Newman L, McDermott D: **A qualitative methodological framework to assess uptake of evidence on SDH in health policy**. *Evidence & Policy* 2014, **Published online**.
8. Fisher M, Baum FE, MacDougall C, Newman L, McDermott D, Phillips C: **Intersectoral action on SDH and equity in Australian health policy**. *Health promotion international* 2016:daw035.
9. Hetzel D, Page A, Glover J, Tennant S: **Inequality in South Australia: Key determinants of wellbeing. Volume 1: the evidence**. Adelaide: SA Department of Health; 2004.
10. Marmot M: **Social determinants and the health of Indigenous Australians**. *Medical Journal of Australia* 2011, **194**(10):512-513.
11. Marmot M, Allen J, Goldblatt P, Boyce T, McNeish D, Grady M, Geddes I: **Fair society, healthy lives, the Marmot review, executive summary: Strategic review of health inequalities in England post-2010**. London: U.K. Department of Health; 2010.
12. Marmot M, Friel S: **Global health equity: Evidence for action on the social determinants of health**. *Journal of Epidemiology & Community Health* 2008, **62**:1095-1097.
13. United Nations General Assembly: **Political declaration of the high-level Meeting of the General Assembly on the prevention and control of non-communicable diseases**. New York: United Nations; 2012.
14. Australian Government: **National Aboriginal and Torres Strait Islander Health Plan 2013–2023**. Canberra: Commonwealth of Australia; 2013.
15. Commonwealth Department of Health and Aged Care: **The influences on mental health**. In: *Promotion, prevention and early intervention for mental health: A monograph*. edn. Canberra: Mental Health and Special Programs Branch: Commonwealth Department of Health and Aged Care; 2000.
16. Whitehead M: **The concepts and principles of equity and health**. *International journal of health services* 1992, **22**(3):429-445.
17. Brown L, Thurecht L, Nepal B: **The cost of inaction on the social determinants of health**. Canberra, ACT: NATSEM; 2012.
18. Kickbusch I, Buckett K (eds.): **Implementing Health in All Policies: Adelaide 2010**. Adelaide: Department of Health, Government of South Australia; 2010.
19. Baum F, Fisher M, Lawless A: **Australian Experiences**. In: *Tackling Health Inequalities; Lessons from international experiences*. edn. Edited by Raphael D. Toronto: Canadian Scholars Press; 2012.
20. Bryant T, Raphael D, Schrecker T, Labonte R: **Canada: A land of missed opportunity for addressing the social determinants of health**. *Health Policy* 2011, **101**(1):44-58.

- 1  
2  
3 1 21. Newman L, Baum F, Harris E: **Federal, state and territory government responses to health inequities and the social determinants of health in Australia.** *Australian Journal of Health Promotion* 2006, **17**(3):217-225.
- 4 2  
5 3  
6 4 22. UCL Institute of Health Equity: **Review of social determinants and the health divide in the WHO European Region: Final report.** Copenhagen: World Health Organization Regional Office for Europe; 2013.
- 7 5  
8 6  
9 7 23. World Conference on Social Determinants of Health: **Rio Political Declaration on Social Determinants of Health.** Rio de Janeiro, Brazil, 21 October 2011: World Health Organization; 2011.
- 10 8  
11 9  
12 10 24. Senate Community Affairs Reference Committee: **Australia's domestic response to the World Health Organisation's (WHO) Commission on Social Determinants of Health report "Closing the gap within a generation".** Canberra: Commonwealth of Australia; 2013.
- 13 11  
14 12  
15 13  
16 14 25. Fisher M, Baum F, MacDougall C, Newman L, McDermott D: **Cross-sectoral action on SDH in Australian health policy: Are we getting there?** Sydney, University of NSW; 2014.
- 17 15  
18 16  
19 17 26. Krieg AS: **Aboriginal incarceration: Health and social impacts.** *Medical Journal of Australia* 2006, **184**(10):534-536.
- 20 18  
21 19 27. Friel S, GRNUHE (eds.): **Improving urban health equity through action on the social and environmental determinants of health: Final Report of the GRNUHE.** London: University College London, The Rockefeller Foundation; 2010.
- 22 20  
23 21  
24 22 28. Galvão LA, Edwards S, Corvalan C, Fortune K, Akerman M: **Climate change and social determinants of health: two interlinked agendas.** *Global health promotion* 2009, **Suppl 1**:81-84.
- 25 23  
26 24  
27 25 29. Australian Council of Trade Unions: **Insecure work, anxious lives: The growing crisis of insecure work in Australia.** Melbourne: ACTU; 2011.
- 28 26  
29 27 30. McRae T, Webster P, Marinova D: **Australia's low-carbon economy and Indigenous people.** *Transformations* 2015, (accepted for publication 9 January 2015).
- 30 28  
31 29  
32 30 31. Anderson I, Baum F, Bentley M (eds.): **Beyond band-aids: Exploring the underlying social determinants of Aboriginal Health. Papers from the Social Determinants of Aboriginal Health Workshop, Adelaide, July 2004.** Darwin: Cooperative Research Centre for Aboriginal Health; 2007.
- 33 31  
34 32  
35 33  
36 34 32. Campbell D, Burgess CP, Garnett ST, Wakerman J: **Potential primary health care savings for chronic disease care associated with Australian Aboriginal involvement in land management.** *Health Policy* 2011, **99**(1):83-89.
- 37 35  
38 36  
39 37 33. Osborne K, Baum F, Brown L: **What works? A review of actions addressing the social and economic determinants of Indigenous health:** Australian Institute of Health and Welfare, Australian Institute of Family Studies; 2013.
- 40 38  
41 39  
42 40 34. Justice Centre: The Council of State Governments: **Justice Reinvestment in North Carolina: Three years later.** Washington DC: TCSG; 2014.
- 43 41  
44 42 35. Howard D, Quinn S, Blokland J, Flynn M: **Aboriginal hearing loss and the criminal justice system.** *Aboriginal Law Bulletin* 1993, **3**(65).
- 45 43  
46 44 36. Howlett M, Ramesh M, Perl A: **Studying public policy: Policy cycles and policy subsystems.** Toronto: Oxford University Press; 2009.
- 47 45  
48 46 37. Aronowitz S: **Introduction.** In: *Critical Theory: Selected Essays.* edn. Edited by M Horkheimer. New York: The Continuum Publishing Company; 2002: xi-xxi.
- 49 47  
50 48 38. Lather P: **Critical Inquiry in Qualitative Research: Feminist and Poststructural Perspectives: Science "After Truth".** In: *Foundations for Research: Methods of Inquiry in Education and the Social Sciences.* edn. Edited by Marraiss Kd, Lapan S. New Jersey: Lawrence Erlbaum Publishers; 2004: 203-215.
- 51 49  
52 50  
53 51  
54 52 39. Crotty M: **The foundations of social research: Meaning and perspective in the research process:** Sage; 1998.
- 55 53  
56 54 40. Danermark B, Ekstrom M, Jakobsen L: **Explaining society: Critical realism in the social sciences.** London: Routledge; 2002.
- 57 55  
58  
59  
60



- 1  
2  
3 1 41. Miller C, Orchard L: **Chapter 1: Towards a new progressive policy agenda.** In:  
4 2 *Australian Public Policy: Progressive Ideas in the Neoliberal Ascendancy.* edn.  
5 3 Edited by Miller C, Orchard L. Bristol: Policy Press; 2014: 3-26.
- 6 4 42. Davis M: **Chapter 2: Neoliberalism, the culture wars and public policy.** In:  
7 5 *Australian public policy: Progressive ideas in the neoliberal ascendancy.* edn. Edited  
8 6 by Miller C, Orchard L. Bristol: Policy Press; 2014: 27-42.
- 9 7 43. Rose N: **Governing “advanced” liberal democracies.** *The anthropology of the*  
10 8 *state: A reader* 1996, **144162.**
- 11 9 44. Galvin R: **Disturbing notions of chronic illness and individual responsibility:**  
12 10 **Towards a genealogy of morals.** *Health* 2002, **6(2):107-137.**
- 13 11 45. Cockerham WC: **Health Lifestyle Theory and the Convergence of Agency and**  
14 12 **Structure\*.** *Journal of Health and Social Behavior* 2005, **46(1):51-67.**
- 15 13 46. Tesh SN: **Hidden arguments: Political ideology and disease prevention policy:**  
16 14 Rutgers University Press; 1988.
- 17 15 47. Carter SM, Hooker LC, Davey HM: **Writing social determinants into and out of**  
18 16 **cancer control: An assessment of policy practice.** *Social Science & Medicine*  
19 17 2009, **68(8):1448-1455.**
- 20 18 48. Fisher M, Baum F, MacDougall C, Newman L, McDermott D: **Australian health**  
21 19 **policy and social determinants of health and equity: A review of policy content.**  
22 20 Sydney, University of NSW; 2013.
- 23 21 49. Fisher M, Baum FE, MacDougall C, Newman L, McDermott D: **To what Extent do**  
24 22 **Australian Health Policy Documents address Social Determinants of Health**  
25 23 **and Health Equity?** *Journal of Social Policy:*1-20.
- 26 24 50. Tesh S: **Hidden Arguments: Political Ideology and Disease Prevention Policy.**  
27 25 New Brunswick, NJ: Rutgers University Press; 1988.
- 28 26 51. Baum F, Fisher M: **Why behavioural health promotion endures despite its failure**  
29 27 **to reduce health inequities.** *Sociology of Health and Illness* 2014, **36(2):213-225.**
- 30 28 52. Hastings G: **Why corporate power is a public health priority.** *BMJ* 2012,  
31 29 **345:e5124.**
- 32 30 53. Freudenberg N: **Lethal but legal: Corporations, consumption and protecting**  
33 31 **public health.** New York: Oxford University Press 2014.
- 34 32 54. Yin RK: **Case study research: Design and methods:** Sage publications; 2013.
- 35 33 55. Liamputtong P, Ezzy D: **Qualitative Research Methods,** 2nd edn. Melbourne,  
36 34 Australia: Oxford University Press; 2006.
- 37 35 56. Corbin J, Strauss A: **Basics of qualitative research.** California: Sage Publications;  
38 36 2008.
- 39 37 57. Bowen GA: **Document analysis as a qualitative research method.** *Qualitative*  
40 38 *research journal* 2009, **9(2):27-40.**
- 41 39 58. Bacchi CL: **Women, policy and politics: The construction of policy problems:**  
42 40 Sage; 1999.
- 43 41 59. Bacchi C: **Analysing policy: What's the problem represented to be?** Frenchs  
44 42 Forest, NSW: Pearson Education; 2009.
- 45 43 60. Whitehead M: **A typology of actions to tackle social inequalities in health.**  
46 44 *Journal of Epidemiology and Community Health* 2007, **61(6):473-478.**
- 47 45 61. Lackey RT: **Values, Policy, and Ecosystem Health Options for resolving the**  
48 46 **many ecological policy issues we face depend on the concept of ecosystem**  
49 47 **health, but ecosystem health is based on controversial, value-based**  
50 48 **assumptions that masquerade as science.** *BioScience* 2001, **51(6):437-443.**
- 51 49 62. Dahlgren G, Whitehead M: **Policies and strategies to promote equity in health.**  
52 50 Copenhagen: World Health Organization, Regional Office for Europe; 1992.
- 53 51 63. Solar O, Irwin A: **A conceptual framework for action on the social determinants**  
54 52 **of health: Social determinants of health discussion paper 2:** WHO; 2010.
- 55 53 64. Wilkinson RG, Marmot MG: **Social determinants of health: the solid facts:** World  
56 54 Health Organization; 2003.

- 1  
2  
3 1 65. Carson B, Dunbar T, Chenhall RD, Bailie R: **Social determinants of Indigenous health**: Allen & Unwin; 2007.
- 4 2  
5 3 66. USDH, (US Department of Health Office of Disease Prevention): **Healthy people 2020**; 2010.
- 6 4  
7 5 67. Northridge ME, Sclar ED, Biswas MP: **Sorting out the connections between the built environment and health: a conceptual framework for navigating pathways and planning healthy cities**. *Journal of Urban Health* 2003, **80**(4):556-568.
- 8 6  
9 7  
10 8 68. Sayer A: **Realism and social science**: Sage; 2000.
- 11 9 69. Kingdon J: **Agendas, Alternatives and Public Policies**, 2 edn. New York: Addison-Wesley Educational Publishers; 2011.
- 12 10  
13 11 70. Lewis JM: **Health Policy and Politics: Networks, Ideas and Power**. Melbourne: IP Communications; 2005.
- 14 12  
15 13 71. Hall PA: **Policy paradigms, social learning, and the state: The case of economic policymaking in Britain**. *Comparative Politics* 1993, **25**(3):275-296.
- 16 14  
17 15 72. Thelen K: **Historical institutionalism in comparative politics**. *Annual Review in Political Science* 1999, **2**:369-404.
- 18 16  
19 17 73. National Congress of Australia's First Peoples: **Submission on the National Aboriginal and Torres Strait Islander Health Plan**. Canberra: NCAFP; 2013.
- 20 18  
21 19 74. Leigh A: **Battlers and billionaires: The story of inequality in Australia**. Melbourne: Black Inc; 2013.
- 22 20  
23 21  
24  
25  
26  
27  
28  
29  
30  
31  
32  
33  
34  
35  
36  
37  
38  
39  
40  
41  
42  
43  
44  
45  
46  
47  
48  
49  
50  
51  
52  
53  
54  
55  
56  
57  
58  
59  
60



1  
2  
3  
4  
5  
6  
7  
8  
9  
10  
11  
12  
13  
14  
15  
16  
17  
18  
19  
20  
21  
22  
23  
24  
25  
26  
27  
28  
29  
30  
31  
32  
33  
34  
35  
36  
37  
38  
39  
40  
41  
42  
43  
44  
45  
46  
47  
48  
49  
50  
51  
52  
53  
54  
55  
56  
57  
58  
59  
60

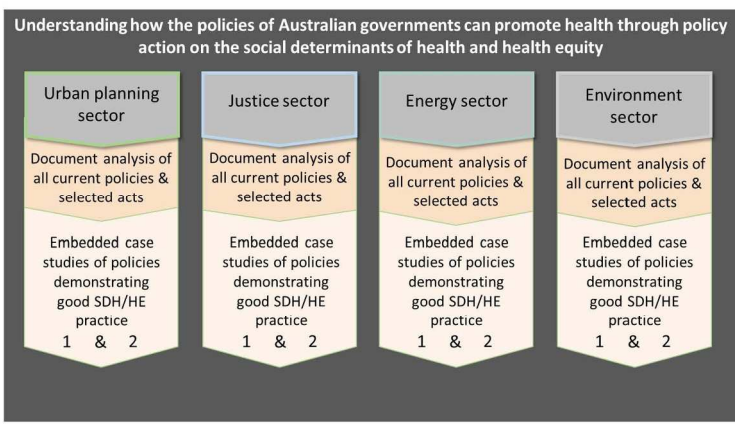

147x207mm (300 x 300 DPI)

1  
2  
3  
4  
5  
6  
7  
8  
9  
10  
11  
12  
13  
14  
15  
16  
17  
18  
19  
20  
21  
22  
23  
24  
25  
26  
27  
28  
29  
30  
31  
32  
33  
34  
35  
36  
37  
38  
39  
40  
41  
42  
43  
44  
45  
46  
47  
48  
49  
50  
51  
52  
53  
54  
55  
56  
57  
58  
59  
60

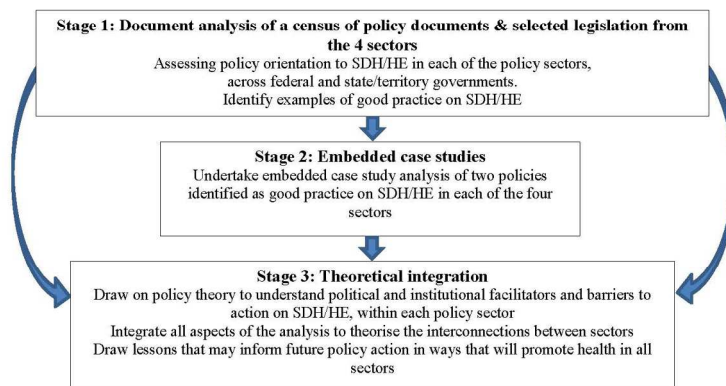

140x198mm (300 x 300 DPI)

# BMJ Open

## A qualitative protocol for understanding the contribution of Australian policy in the urban planning, justice, energy and environment sectors to promoting health and health equity

|                                 |                                                                                                                                                                                                                                                                                                                                                                                                                                                                                                                                                                      |
|---------------------------------|----------------------------------------------------------------------------------------------------------------------------------------------------------------------------------------------------------------------------------------------------------------------------------------------------------------------------------------------------------------------------------------------------------------------------------------------------------------------------------------------------------------------------------------------------------------------|
| Journal:                        | <i>BMJ Open</i>                                                                                                                                                                                                                                                                                                                                                                                                                                                                                                                                                      |
| Manuscript ID                   | bmjopen-2018-025358.R1                                                                                                                                                                                                                                                                                                                                                                                                                                                                                                                                               |
| Article Type:                   | Protocol                                                                                                                                                                                                                                                                                                                                                                                                                                                                                                                                                             |
| Date Submitted by the Author:   | 02-Sep-2018                                                                                                                                                                                                                                                                                                                                                                                                                                                                                                                                                          |
| Complete List of Authors:       | Baum, Fran; Flinders University, Southgate Institute for Health, Society and Equity<br>Delany-Crowe, Toni; Flinders University, Southgate Institute for Health, Society and Equity<br>Fisher, Matthew; Flinders University, Southgate Institute for Health, Society and Equity<br>Macdougall, C; Flinders University, College of Medicine and Public Health<br>Harris, Patrick; University of Sydney, Menzies Centre for Health Policy<br>McDermott, Dennis; Flinders University, Poche Centre<br>Marinova, Dora; Curtin University, Sustainability Policy Institute |
| <b>Primary Subject Heading</b>: | Health policy                                                                                                                                                                                                                                                                                                                                                                                                                                                                                                                                                        |
| Secondary Subject Heading:      | Health policy                                                                                                                                                                                                                                                                                                                                                                                                                                                                                                                                                        |
| Keywords:                       | PUBLIC HEALTH, QUALITATIVE RESEARCH, Health policy < HEALTH SERVICES ADMINISTRATION & MANAGEMENT, Protocols & guidelines < HEALTH SERVICES ADMINISTRATION & MANAGEMENT                                                                                                                                                                                                                                                                                                                                                                                               |
|                                 |                                                                                                                                                                                                                                                                                                                                                                                                                                                                                                                                                                      |

SCHOLARONE™  
Manuscripts

# Title page

## Title of paper

A qualitative protocol for understanding the contribution of Australian policy in the urban planning, justice, energy and environment sectors to promoting health and health equity

## Authors

Professor Fran Baum, Southgate Institute for Health, Society and Equity, Flinders University [fran.baum@flinders.edu.au](mailto:fran.baum@flinders.edu.au)

Dr Toni Delany-Crowe, (**Corresponding author**) Southgate Institute for Health, Society and Equity, Flinders University [toni.delanycrowe@flinders.edu.au](mailto:toni.delanycrowe@flinders.edu.au)

Dr Matthew Fisher, Southgate Institute for Health, Society and Equity, Flinders University [matt.fisher@flinders.edu.au](mailto:matt.fisher@flinders.edu.au)

Professor Colin MacDougall, Southgate Institute for Health, Society and Equity, Flinders University [colin.macdougall@flinders.edu.au](mailto:colin.macdougall@flinders.edu.au)

Dr Patrick Harris, Menzies Centre for Health Policy, University of Sydney [patrick.harris@sydney.edu.au](mailto:patrick.harris@sydney.edu.au)

Professor Dennis McDermott, Poche Centre for Indigenous Health & Wellbeing, Flinders University, [dennis.mcdermott@flinders.edu.au](mailto:dennis.mcdermott@flinders.edu.au)

Professor Dora Marinova, Sustainability Policy Institute, Curtin University, [D.Marinova@curtin.edu.au](mailto:D.Marinova@curtin.edu.au)

## Author Contributions

All authors have made substantial contributions to the conception and design of this work. FB and MF led the development and writing of the original grant application. All authors collaborated to determine the processes for data collection, analysis and dissemination. All authors also reviewed and made critical comments on drafts of the original grant application. After the funding was awarded, FB, TDC and CM led development, testing and refinement of the coding framework and associated data analysis processes, with intellectual input from MF, PH, DMcD and DM. TDC led development of this manuscript with critical review provided by all other authors. All authors approved the final version of this manuscript and are prepared to take responsibility for the content. All authors also agree to be accountable for all aspects of the work and for ensuring that questions related

1 to the accuracy or integrity of any part of the work are appropriately investigated and  
2 addressed.

### 3 4 **Acknowledgments**

5 Professor Margaret Whitehead, Professor Peter Sainsbury, Ms Carmel Williams, Dr Anthea  
6 Krieg and Associate Professor Lester Wright are partner investigators on the research  
7 project. All have advised on the research design, guided the conduct of the research and  
8 contributed sectoral based expertise.

9 Dr Michael McGreevy and Ms Emily Riley are employed as researchers on this project, and  
10 have key roles in data collection and analysis. Dr Michael McGreevy provided research  
11 assistance to support development of an early draft of this manuscript by reorganising and  
12 reformatting sections of the original grant application.

## 15 **Main document**

### 17 18 **Abstract**

19 **Introduction:** A well-established body of literature demonstrates that health and equity  
20 are strongly influenced by the consequences of governments' policy and resultant actions  
21 (or inactions) outside the health sector. Consequently, the United Nations, and its agency  
22 the World Health Organisation, have called for national leadership and whole-of-  
23 government action to understand and address the health impacts of policies in *all* sectors.  
24 This research responds to that call by investigating how policy making in four sectors-  
25 urban planning, justice, energy and environment- may influence the social determinants of  
26 health and health equity (SDH/HE).

27 **Methods and analysis:** The research design is informed by a critical qualitative  
28 approach. Three successive stages are included in the design. The first involves analysing  
29 all strategic policy documents and selected legislative documents from the four sectors  
30 (n=583). The document analysis is based on a coding framework developed to identify  
31 alignment between the documents and the SDH/HE. Two policies that demonstrate good  
32 practice in regard to SDH/HE will be selected from each sector during the second stage for  
33 embedded case study analysis (total n=8). This is intended to illuminate which factors have

1 supported recognition and action on SDH/HE in the selected policies. The third stage  
2 involves progressive theoretical integration and development to understand political and  
3 institutional facilitators and barriers to action on SDH/HE, both within and between sectors.  
4 **Ethics and dissemination:** The research will provide much needed evidence about how  
5 coherent whole-of-government action on SDH/HE can be advanced and contribute  
6 knowledge about how health-enhancing policy activity in the four sectors may be optimised.  
7 Learnings from the research will be shared via a project advisory group, policy briefings,  
8 academic papers, conference presentations and research symposia. Ethics approval has  
9 been secured for the embedded case studies, which involve research participants.

### 11 **Strengths and limitations of this study**

- 12 • A census of all relevant policies will be analysed, allowing a comprehensive view of  
13 the policy landscape across and within the four sectors.
- 14 • Data collection is bounded by set time periods so will not include new documents as  
15 they are released.
- 16 • The embedded case studies focus on examples of good practice, facilitating learning  
17 about how strong policy can be developed to improve health and equity.
- 18 • The design of the study will not allow direct evaluation of the population health  
19 impacts of policy interventions, instead causal links between policy implementation  
20 and improvements in health will be theorised.

### 22 **Introduction**

23 Life expectancies have been increasing globally over the last century. Despite some  
24 setbacks, including the HIV/AIDS crisis in Africa, people are generally living much longer  
25 than they did a century ago. The benefits of this increase in life expectancy, however, are  
26 not evenly shared, neither internationally nor within countries [1].

27  
28 Australia is one of the best performers. On average, life expectancy has increased by 25  
29 years over the last century [2]. In Australia, males born between 2013 and 2015 are  
30 expected to live to the age of 80.4 years and females born in this period are expected to  
31 live to 84.5 years [3]. Significant gaps remain, however, between the health status of  
32 population groups in Australia based on income, education, employment status, rurality,  
33 gender and ethnicity. In particular, Aboriginal and Torres Strait Islanders have an average

1  
2  
3 1 life expectancy approximately ten years below the national average [3], and experience  
4 2 higher levels of chronic disease [4]. Social changes, represented in health risks such as the  
5 3 obesity epidemic [5], and increasing economic inequities, also present new threats to  
6 4 Australians' health and may undermine past gains in regard to rates of morbidity and  
7 5 mortality, as well as population wellbeing overall. Given the existence of such threats, along  
8 6 with enduring, unfair differences in health status between population groups, a continued  
9 7 research focus on ways to optimise the health of Australians is vital. The Australian  
10 8 Research Council funded project that is outlined in this paper will contribute knowledge  
11 9 about how health may be improved by actions across *multiple* policy sectors. It builds on  
12 10 previous research examining action on the social determinants of health and health equity  
13 11 within policies from Australian health departments only [6-8].  
14  
15  
16  
17  
18  
19  
20  
21  
22

### 23 **The social determinants of health and health equity (SDH/HE)**

24 Evidence shows that individual and population health are strongly influenced by the  
25 15 socioeconomic and cultural environments in which people live and work in all countries [1,  
26 16 9]. It is apparent that differences in daily living conditions contribute significantly to  
27 17 inequalities in health outcomes within and between countries [10-12]. The circumstances of  
28 18 daily life that influence and shape the distribution of socioeconomic and cultural resources  
29 19 are now widely recognised in research and policy as *social determinants of health* (SDH) [1,  
30 20 13-15]. Furthermore, health inequalities caused by *avoidable* and *unfair* socioeconomic  
31 21 and/or cultural inequalities are recognised as *health inequities* (HE) [16]. Effective action on  
32 22 SDH/HE in policy could produce significant savings in public expenditure and improve  
33 23 productivity. In Australia, a study found that through such action "500,000 Australians could  
34 24 avoid suffering a chronic illness; 170,000 extra Australians could enter the  
35 25 workforce,...[and] annual savings of \$4 billion in welfare support payments could be made"  
36 26 [17].  
37  
38  
39  
40  
41  
42  
43  
44  
45  
46  
47

### 48 **Policy and SDH/HE**

49 The evidence on SDH/HE shows that health and health equity can be maintained,  
50 30 worsened or improved by government policy actions (or inactions) both within and outside  
51 31 of the health sector. Effective whole-of-government action on SDH/HE relies, in part, on  
52 32 *cross-sectoral* collaboration between the public agencies responsible for different areas of  
53 33 government policy [4, 18]. Sustained whole-of-government action to address SDH/HE,  
54  
55  
56  
57  
58  
59  
60

1  
2  
3 1 however, remains elusive in many countries, including Australia [19-22]. Furthermore,  
4 2 cross-sectoral strategies in Australian health policy, are predominantly focused on medical  
5 3 care and individualised health promotion, rather than on addressing SDH/HE [8]. As a  
6 4 result, it is clear that current health research requires a broader scope; allowing it to extend  
7 5 beyond the health sector and beyond cross-sectoral work driven by the health sector.  
8  
9  
10  
11 6

12 7 Adding further impetus to this research agenda, the United Nations [13] and its agency the  
13 8 World Health Organisation (WHO) [23], have called for national leadership to understand  
14 9 and address the health effects of policies in *all* sectors. In 2013 an Australian Senate  
15 10 inquiry into Australia's national response to the WHO Commission on Social Determinants  
16 11 of Health [1] recommended consideration of SDH/HE in *all* relevant policy development  
17 12 activities [24].  
18  
19  
20  
21  
22  
23

24 14 The research study described in this paper is responding to such calls by devising robust  
25 15 means to analyse how government policies in sectors other than health contribute to  
26 16 wellbeing and health equity. This will be achieved through an examination of how policy and  
27 17 policy making in four Australian policy sectors that do not frequently feature as partners in  
28 18 cross-sectoral health policies to address SDH/HE [25], may facilitate or obstruct action on  
29 19 SDH/HE. The four sectors are urban (land-use) planning, justice, energy and environment.  
30  
31  
32  
33  
34  
35

### 36 21 **Interactions between policy areas**

37 22 There has been no systematic research in Australia to investigate how policy in the urban  
38 23 planning, justice, energy and environment sectors proposes action on SDH/HE; or how the  
39 24 institutional norms and values expressed in the policies of these sectors facilitate or  
40 25 obstruct such action. Policy settings in each of the sectors are, however, likely to have  
41 26 significant positive or negative effects on health and/or health inequities by affecting known  
42 27 SDH/HE in many areas. These areas include incarceration [26], design of urban form and  
43 28 housing security [27], adaptation to climate change [28], and the shaping of the energy and  
44 29 employment markets [29]. Policy settings in each sector may also affect SDH/HE through  
45 30 interaction with those in another area; for example, housing for people exiting prison [26], or  
46 31 low-carbon jobs training opportunities for Aboriginal and Torres Strait Islanders [30].  
47  
48  
49  
50  
51  
52  
53  
54  
55  
56  
57  
58  
59  
60



1  
2  
3 1 In each sector, policies have particular implications for Indigenous Australians' health [31-  
4 2 33]. For example, the adverse health effects arising from the high rates of incarceration of  
5 2 3 Aboriginal and Torres Strait Islander people, occurring under justice sector policies, are  
6 3 4 likely to undermine health gains achieved elsewhere [31]. Similarly, improving the health of  
7 4 5 Aboriginal and Torres Strait Islander people through work on the SDH/HE will have flow-on  
8 5 6 effects in furthering progress towards the goals of the health sector, but also in addressing  
9 6 7 the underlying determinants of incarceration [26, 34, 35], thereby reducing pressure on the  
10 7 8 criminal justice system. Acknowledging such interconnections between policy sectors,  
11 8 9 including the potential breadth of flow-on effects, highlights the importance of the current  
12 9 10 research study.

### 11 **Research aims**

12 The aims of the study are as follows.

- 13 1. Advance knowledge of the extent to which Australian federal and state/territory  
14 2 governments' policies in the justice, urban planning, environment and energy  
15 3 sectors recognise evidence and propose action on SDH/HE, in ways that are  
16 4 likely to improve health or reduce health inequities.
- 17 2. Identify opportunities for, and barriers to, improved action on SDH/HE within the  
18 3 policy positions of the selected sectors, including in relation to collaboration with  
19 4 other sectors.
- 20 3. Advance understanding of factors leading to incorporation of actions on SDH/HE  
21 4 in policy development, in each selected sector, and across sectors.
- 22 4. Understand how policy in each of the selected sectors disposes them to action on  
23 5 social determinants to improve the health of Indigenous Australians.
- 24 5. Understand how political values and institutional norms (including those driven by  
25 6 neoliberalism) shaping policy in the selected sectors affect prospects for  
26 7 improved cross-sectoral action, or whole-of-government action, on SDH/HE in  
27 8 Australia.

### 29 **Methods and analysis**

#### 30 **Assumptions informing the research design**

31 The design of the research is premised on the view that Australian governments can and  
32 33 should follow UN and WHO advice and ensure that policies in all sectors, according to their  
particular responsibilities, address SDH/HE in ways that are likely to support good health,

1 and avoid adverse effects on health. The research draws upon the report and  
2 recommendations of the Commission on the Social Determinants of Health in envisaging  
3 how all four sectors can seek to ensure, as far as possible, that their policy actions create  
4 conditions conducive to health and health equity [1]. The research design also adopts the  
5 theoretical stance that historically accumulated political and policy values, norms and  
6 practices within government agencies (as institutions) are likely to significantly shape their  
7 dispositions (positive or negative) toward engagement in such efforts [36].

### 8 **Critical inquiry**

9 Critical theory underpins the research design. The broad intent is to understand existing  
10 social systems (especially politics and bureaucracies), and examine their impacts while also  
11 assisting in the development of strategies for practical social change. The task of a critical  
12 researcher is to examine and deconstruct particular understandings of the world to show  
13 how they are produced and what the implications of their production are [37]. Therefore,  
14 undertaking critical inquiry involves examining how social circumstances are mediated by  
15 dynamics of power and how they manifest within, and serve to reinforce, various  
16 interrelated sources of inequity, such as those formed on the basis of socioeconomic  
17 positioning [38]. Within this approach policy is considered a key vehicle for the transmission  
18 of power. Examining policy through a critical theory lens in this research involves  
19 deconstructing the content of policy documents, interrogating the systems that produced  
20 that content, and applying theory to produce new understandings. The understandings are  
21 focussed on questions of what realities are produced through policy, why policies are  
22 shaped in a given way and to what effect, while reimagining how the application of different  
23 policy framings may create different, fairer, healthier social conditions.

### 24 **Qualitative inquiry**

25 A qualitative approach was selected because it facilitates the development of detailed,  
26 integrative analyses of the processes and impacts under investigation [39]. Detailed  
27 analysis and explanation is vital to understand the complexity of policies and the systems  
28 that produce them. Qualitative analysis also seeks to uncover the meanings and  
29 understandings applied by policy actors directly involved in developing and implementing  
30 policy [39], which is helpful in allowing examination of their experiences and ideas.

### 31 **Concepts central to contemporary public health that will be explored in the** 32 **research**

1  
2  
3 1 Two of the key concepts that have been shown to be central in contemporary public health  
4 2 debates - neoliberalism and lifestyle drift - will be considered during the research. This  
5 3 section presents an overview of the conceptual relevance of neoliberalism to the sectoral  
6 4 norms and values that are under examination in this study, and explains its potential to  
7 5 stimulate drift within policies, to which the researchers must remain attentive throughout the  
8 6 study.

### 7 **Neoliberalism as an institutional norm, and its relevance to the research**

8 Within public health there is a tension between structure and agency. This stems from the  
9 9 question of what matters more in shaping life circumstances: the influence of individual's  
10 10 behaviour and choices, or the influence of the social environments in which individuals live?  
11 11 [40]. The structure/agency debate has intensified with the rise of neoliberalism in  
12 12 contemporary societies [41]. Governments influenced by neoliberal ideas (which, arguably,  
13 13 includes all current governments in Australia) focus on facilitating competitive free markets,  
14 14 privatisation and reducing regulatory controls on market activity in the belief that these will  
15 15 stimulate individual enterprise and economic growth [41, 42]. Given this focus, there is a  
16 16 shift away from the belief that governments have the obligation to take responsibility for  
17 17 society, and to protect the wellbeing of individuals. This belief is being eroded during the  
18 18 transition towards a model where individuals are regarded as having the power and  
19 19 obligation to take responsibility for themselves, in the quest to become self-reliant [43, 44].  
20 20 This stance disposes governments to favour understandings of the origins of health and ill  
21 21 health that focus on individualised behaviour and biomedical (rather than social) factors [44,  
22 22 45]. It also encourages governments to reject their responsibility to care for citizens by  
23 23 creating health promoting social and economic environments [46].

24  
25 25 During the study we explore the extent to which policy values and institutional norms in the  
26 26 four sectors reflect neoliberal values. If there are instances where neoliberal values are not  
27 27 reflected, and there instead appears to be genuine government commitment to improving  
28 28 the structural conditions of society in order to address SDH/HE we examine how this has  
29 29 come about. Such investigation is useful in learning about ways governments may resist  
30 30 neoliberal ideals in order to pursue policies for broad social (rather than only economic)  
31 31 progress and wellbeing.

### 33 **Examining 'drift'**

1  
2  
3 1 Given the pervasive influence of neoliberalism in Australia [41] it is vital for this research to  
4 2 investigate whether the adoption of socio-structural or individualised views of problems and  
5 3 solutions are influencing policy in the four sectors in ways that facilitate or obstruct policy  
6 4 action on SDH/HE. Research on health policy has found that contemporary policies often  
7 5 make rhetorical acknowledgement of evidence on the social, economic or cultural factors  
8 6 affecting health, but nevertheless propose strategies predominantly focused on treating  
9 7 individual illness, or motivating individuals to improve health behaviours [47-49]; a  
10 8 phenomenon labelled as 'lifestyle drift' [48]. Theoretical perspectives on health policy  
11 9 suggests that such 'drift' may occur in part because of political incentives for governments  
12 10 in neoliberal societies to couch health problems and propose solutions in predominantly  
13 11 individualised terms; thereby avoiding the 'need' to contemplate politically sensitive  
14 12 changes to existing socioeconomic or cultural conditions that challenge powerful interests  
15 13 [50, 51]. Evidence supports these views, showing that governments are sometimes subject  
16 14 to political pressures from interest groups to frame health policy in individualised terms [52,  
17 15 53]. Our research strategy is designed to enable us to document the extent to which  
18 16 neoliberalism and lifestyle drift have influenced the policies and policy making processes  
19 17 under investigation. Hence, as described next, we are utilising document analysis to ensure  
20 18 particularly careful scrutiny of the policy documents, and through this scrutiny draw out  
21 19 important policy silences (or vital areas not addressed in the policies) that are related to  
22 20 relevant aspects of SDH/HE.  
23  
24  
25  
26  
27  
28  
29  
30  
31  
32  
33  
34  
35  
36  
37

## 38 **Design of the study**

39 23 As explained earlier the research is focussed on four sectors: urban planning, justice,  
40 24 energy and environment. These sectors form the primary case studies for the research, as  
41 25 shown in Figure 1.  
42  
43  
44

## 45 **Figure 1 Overview of the research design**

46 28 Insert Figure 1 here  
47  
48  
49

50 30 The four sectors were selected following a rapid desktop review of departments and  
51 31 agencies in all Australian jurisdictions (federal and state/territory governments) to identify  
52 32 policy sectors with the following characteristics:

53 33 a) sectors that are not typically regarded as health or human service sectors and  
54  
55  
56  
57  
58  
59  
60

- 1  
2  
3 1 which are, therefore, not usually regarded as having responsibility to promote  
4 2 population health and equity;  
5  
6 3 b) sectors that nevertheless control areas of policy that evidence shows to  
7 4 influence SDH/HE, including in relation to Indigenous health;  
8  
9 5 c) sectors that match the skills and experiences of the investigators; and  
10  
11 6 d) sectors that have discrete agencies responsible for the relevant areas of policy  
12 7 within all Australian government jurisdictions.  
13  
14 8

15  
16 9 To provide clarity about what areas each sector covered, further desktop analysis was  
17 10 conducted across all governments in all jurisdictions. This resulted in us defining each  
18 11 sectoral area in the following ways.

- 12 12 1. **Urban planning** – incorporating focus on planning, infrastructure, transport and  
13 13 essential services;  
14 14 2. **Justice** – incorporating focus on Attorney General functions, courts, policing and  
15 15 corrections;  
16 16 3. **Energy**– incorporating focus on all aspects of energy systems, including generation,  
17 17 network management, retailing, employment, mining, resources and renewal; and  
18 18 4. **Environment** – incorporating policy on environmental protection, natural resources and  
19 19 land management.  
20 20

21 21 All current policy documents from each sector have already been collected. Collecting a  
22 22 ‘census’ of policies is enabling us to sketch the landscape in each sector across each  
23 23 jurisdiction in Australia to understand policy activity in each of the four sectors, and to  
24 24 question how it is orientated to work on the SDH/HE. From the census, examples of policies  
25 25 that showcase good practice on SDH/HE are being identified. Two such policies from each  
26 26 sector will be selected as embedded case studies. As explained by Yin [54], embedded  
27 27 case studies allow researchers to study multiple sub-units of analysis within a broader case.  
28 28 The advantage of this is that researchers can focus on instances of a broader phenomenon  
29 29 and study those instances in detail to derive deep understandings that may not be possible  
30 30 from the study of an overall case as a broader whole. Analysing a case, as well as sub-  
31 31 units of that case, allows researchers to generate a more comprehensive view, which  
32 32 assists in adequately addressing the ‘how’ and ‘why’ questions that drive case study  
33 33 research [54].  
34 34

1  
2  
3 1 Within this research, studying the embedded case studies will allow us to generate  
4 2 explanations about why particular policies did consider SDH/HE and, crucially, to illuminate  
5 3 the conditions surrounding this inclusion. The census approach to studying each sector and  
6 4 the embedded case study research is being undertaken during successive stages, as  
7 5 shown in Figure 2.  
8  
9  
10

## 11 **Figure 2 Successive stages of the research**

12  
13  
14 Insert Figure 2 here  
15  
16  
17

18  
19 10 Each of the three stages shown in Figure 2 is explained in detail next. At the time of writing  
20 11 this paper, Stage 1 of the research had already commenced, and the tense changes within  
21 12 the paper between present and future tense reflect this.  
22 13

### 23 14 **Stage 1- Document analysis of a census of policy documents and selected** 24 15 **legislation from the four sectors**

25 16 Qualitative document analysis provides a systematic procedure for reviewing and  
26 17 evaluating documents. Like other qualitative methods, document analysis requires data to  
27 18 be examined and interpreted by researchers to elicit meaning and develop understanding  
28 19 about what is present and not present in the data, and to what effect [55, 56]. Document  
29 20 analysis involves coding, synthesising and theorising research data to develop empirical  
30 21 knowledge about a subject area [55, 56]. The first step involves collecting the necessary  
31 22 documents [57].  
32  
33  
34

35  
36  
37  
38  
39 24 Data sets of all current, strategic policy and selected legislative documents from each of the  
40 25 four sectors across the nine Australian governments (all state and territory governments,  
41 26 and the federal government) have been compiled. To be considered strategic policy, the  
42 27 documents needed to include the goals, objectives and strategies of a relevant department  
43 28 in regard to a specific area of policy responsibility. This criterion excludes documents such  
44 29 as operational guidelines and technical descriptions of sectoral processes. Legislation was  
45 30 only included in instances where it addressed an area of sectoral responsibility for which  
46 31 there was no strategic policy. The data collection process garnered 583 documents across  
47 32 the four sectors (108 from urban planning, 165 from justice, 132 from energy and 178 from  
48 33 environment).  
49  
50  
51  
52  
53  
54  
55  
56  
57  
58  
59  
60



1  
2  
3 1 The document analysis is employing a detailed coding framework and NVivo 11 software is  
4 2 being used to undertake the analysis. Table 1 summarises the coding framework. During  
5 3 the qualitative document analysis process, each document is read at least twice by one  
6 4 member of the research team. The first reading familiarises the researcher with the  
7 5 document structure and the topics covered. The second closer reading facilitates the coding  
8 6 of the content of each document according to pre-defined categories in the coding  
9 7 framework (see Table 1). During the coding process the framing of the document goals,  
10 8 objectives, strategies, and values articulated throughout the document are assessed to  
11 9 determine how and whether these align with our adopted frameworks for understanding  
12 10 optimal policy action on SDH/HE in Australia.  
13  
14  
15  
16  
17  
18  
19  
20

21 12 Following the coding process, a document summary is written to explain whether (and if so  
22 13 how) the content of each policy aligns with the coding framework, to identify the main  
23 14 themes in the document and to highlight the dominant focus being applied (for example a  
24 15 neoliberal focus on economic gains, a focus on structural change, or an emphasis on the  
25 16 need to modify the behaviours of individuals etc.). After all documents in a jurisdiction  
26 17 (federal, state/territory) have been coded for each sector, a jurisdiction summary is then  
27 18 written, highlighting the key themes and policy intent across the jurisdiction. In both the  
28 19 document and jurisdiction summaries silences are identified where no aspect of the  
29 20 document can be coded into a particular category within the framework. Additionally,  
30 21 silences are being identified when the strategic intent of the objectives and/or proposed  
31 22 strategies of the document do not align with the stated goals, leaving some aspects either  
32 23 completely or partially ignored within the proposed actions. It is at this stage that lifestyle  
33 24 drift is being identified through reflection on instances within policy documents where the  
34 25 goals of the policy recognise or express an apparent intent to address SDH/HE, but this is  
35 26 not followed through in the proposed strategies, with an emphasis instead on strategies to  
36 27 change individual behaviour.  
37  
38  
39  
40  
41  
42  
43  
44  
45  
46  
47  
48

49 29 The coding results and document summaries are peer reviewed during research team  
50 30 meetings. The team meetings are held fortnightly, and are conducted on a sector based  
51 31 rotation, so that each sector is discussed among the investigators and project staff at least  
52 32 once every two months. Periodically a meeting on all sectors is held to discuss the  
53 33 intersections between the findings that are emerging across the sectors.  
54  
55  
56  
57  
58  
59  
60



1 During team discussions, the analytical approach of Bacchi [58, 59] is being applied to  
 2 question how the framing of the documents may influence policy development and  
 3 implementation, and how responses to defined problems would differ if the intent and goals  
 4 articulated in the documents were framed differently. In addition, Whitehead's [60] typology  
 5 of actions is also being utilised to examine the theory of change that underlies the intent of  
 6 each policy (i.e. questioning if the intent is to strengthen individuals, strengthen  
 7 communities, improve living and working conditions or address socio-economic inequities).

9 **Table 1: Coding framework being applied during Stage 1 of the project**

| Coding focus                                                                                                                                                                                                                                                                                                                                                                                                                                                                                                                            | Nodes/categories                                                                                                                 | Explanation                                                                                                                                                                                                                                     |
|-----------------------------------------------------------------------------------------------------------------------------------------------------------------------------------------------------------------------------------------------------------------------------------------------------------------------------------------------------------------------------------------------------------------------------------------------------------------------------------------------------------------------------------------|----------------------------------------------------------------------------------------------------------------------------------|-------------------------------------------------------------------------------------------------------------------------------------------------------------------------------------------------------------------------------------------------|
| <p data-bbox="99 688 776 724"><b>Framing of the discussion</b></p> <p data-bbox="99 751 776 1045">The process for coding the framing of the document content is drawn from <i>What's the Problem Represented to be?</i> approach to policy analysis [58, 59]. All introductory sections of documents are coded to capture the perspectives being applied by the sector. Introductory sections are those that precede dedicated discussion of goals, strategies and objectives in the policy document, excluding the contents pages.</p> | <p data-bbox="776 688 1036 787">What is the problem represented to be?</p>                                                       | <p data-bbox="1036 688 1424 951">Text that explicitly or implicitly demonstrates what the authors of the document consider to be the problem/issue that needs to be addressed by the particular policy document or Act that is being coded.</p> |
|                                                                                                                                                                                                                                                                                                                                                                                                                                                                                                                                         | <p data-bbox="776 978 1036 1108">What response is considered appropriate by the government?</p>                                  | <p data-bbox="1036 978 1424 1178">Text that highlights what the government thinks is necessary to address the problem/issue identified above. I.e. What is the policy/Act designed to do?</p>                                                   |
|                                                                                                                                                                                                                                                                                                                                                                                                                                                                                                                                         | <p data-bbox="776 1241 1036 1308">What else needs to be addressed?</p>                                                           | <p data-bbox="1036 1241 1424 1465">Text that highlights what <i>else</i> the government considers to be problematic, even though these problems/issues may be outside the scope of the particular policy/Act being coded.</p>                   |
|                                                                                                                                                                                                                                                                                                                                                                                                                                                                                                                                         | <p data-bbox="776 1755 1036 1791">How does the sector understand the relationships between their work and health and equity?</p> | <p data-bbox="1036 1755 1424 1854">Text that highlights explicitly or implicitly how the authors of the document understand the connections between the work of their sector and the health and/or equity of the population.</p>                |
|                                                                                                                                                                                                                                                                                                                                                                                                                                                                                                                                         | <p data-bbox="776 1879 1036 1890">Strength</p>                                                                                   | <p data-bbox="1036 1879 1424 1890">What is identified by the government as an existing strength in the policy area.</p>                                                                                                                         |

| Coding focus                                                                                                                                                                                                                                                                                                                                                                                                                                                                                                                                                                                                                                                                                                                                                                                                                                                                                                                                                                                                                  | Nodes/categories                                                                                          | Explanation                                                                                                                                                                                                                                                                                                                                                                                                                                                                                                                                                                                                                                                              |
|-------------------------------------------------------------------------------------------------------------------------------------------------------------------------------------------------------------------------------------------------------------------------------------------------------------------------------------------------------------------------------------------------------------------------------------------------------------------------------------------------------------------------------------------------------------------------------------------------------------------------------------------------------------------------------------------------------------------------------------------------------------------------------------------------------------------------------------------------------------------------------------------------------------------------------------------------------------------------------------------------------------------------------|-----------------------------------------------------------------------------------------------------------|--------------------------------------------------------------------------------------------------------------------------------------------------------------------------------------------------------------------------------------------------------------------------------------------------------------------------------------------------------------------------------------------------------------------------------------------------------------------------------------------------------------------------------------------------------------------------------------------------------------------------------------------------------------------------|
| <p>Determine the focus of the <b>goals, objectives and strategies</b> contained within the document</p> <p>Definitions:</p> <p><u>Goal</u>: Wording in the document describing what the government wishes to achieve <i>overall</i>. [The ultimate desired outcome overall. Often phrased as broad statements]</p> <p><u>Objective</u>: Wording in the document that describes, more specifically, <i>a particular improvement</i> in performance that the government intends to achieve. [A more specific statement than a goal statement- it indicates what is desired for a particular aspect of activity]</p> <p><u>Strategy</u>: Wording describing a particular <i>action</i> that will be implemented within an area of government activity. [i.e. specific statements about what will be done]</p>                                                                                                                                                                                                                    | <p>Relates generally to health</p> <p>Relates to a specific SDH</p> <p>Relates to equity</p> <p>Other</p> | <p>All goal/objective/strategy statements that are consistent with a general focus on health but that do not mention a specific SDH from the list shown in Box 1</p> <p>All goal/objective/strategy statements that include reference to a specific SDH from the list shown in Box 1</p> <p>All goal/objective/strategy statements that are consistent with a focus on narrowing avoidable and unfair gaps between groups (a levelling up approach to equity), or on making improvements across the gradient of advantage/disadvantage (a gradient approach to equity)</p> <p>Other goal/objective/strategy statements that are not related to health, equity or SDH</p> |
| <p><b>Value statements</b></p> <p>Value statements are coded where they are listed explicitly under sections titled 'values' or 'principles' as well as within other text where values appear more implicitly.</p> <p>Values are important because how an issue is framed in a policy, and what actions are considered appropriate, depends on the values, ideas and judgments made by the people involved, those that circulate within the sector within which the policy is being written and within the broader political and bureaucratic contexts surrounding the policy (current and historical). As such values, ideas and judgments become structuring forces within policy development - however, sometimes they are implicit and their role in structuring discussion is not obvious [61]. Since values shape how a policy is framed it is important to determine which values are being expressed both explicitly and implicitly, to understand how and why an issue is being represented in a particular way.</p> | <p>Relates generally to health</p> <p>Relates to a specific SDH</p> <p>Relates to equity</p> <p>Other</p> | <p>Value statement that reflects the importance of health in general</p> <p>Value statement that reflects the importance of a specific SDH listed in Box 1</p> <p>Value statements that reflect the importance of equity or fairness</p> <p>Other value statement that is not related to health, equity or a SDH</p>                                                                                                                                                                                                                                                                                                                                                     |

| Coding focus                                                                                                                                                                                                                                                                                                                                                                                                                                                                                                                                                                                                                                                                | Nodes/categories                                     | Explanation                                                                                                                                                                                                                                                          |
|-----------------------------------------------------------------------------------------------------------------------------------------------------------------------------------------------------------------------------------------------------------------------------------------------------------------------------------------------------------------------------------------------------------------------------------------------------------------------------------------------------------------------------------------------------------------------------------------------------------------------------------------------------------------------------|------------------------------------------------------|----------------------------------------------------------------------------------------------------------------------------------------------------------------------------------------------------------------------------------------------------------------------|
| <p><b>Evidence use to support claims</b></p> <p>Evidence use is determined through analysis of there being <u>citations</u> included in the documents.</p> <p>Instances in the document that explicitly refer to evidence use without a citation are also coded- such as "Evidence suggests that ...."</p> <p>In addition, where the title of a document is included in a sentence but no formal citation is included, this is still coded as evidence.</p> <p>Exclusions: Sweeping statements such as "It is well known that..." are not coded as reflecting evidence use if no formal citation or document reference is provided to support such sweeping statements.</p> | Evidence- health                                     | The citation/evidence reflects an explicit focus on health                                                                                                                                                                                                           |
|                                                                                                                                                                                                                                                                                                                                                                                                                                                                                                                                                                                                                                                                             | Evidence- SDH                                        | The citation/evidence appears to reflect a focus on one of the SDH in Box 1                                                                                                                                                                                          |
|                                                                                                                                                                                                                                                                                                                                                                                                                                                                                                                                                                                                                                                                             | Evidence- Equity                                     | The citation/evidence reflects a focus on equity (levelling up approach or gradient focus)                                                                                                                                                                           |
|                                                                                                                                                                                                                                                                                                                                                                                                                                                                                                                                                                                                                                                                             | Other evidence- Not related to health, equity or SDH | Evidence is cited/referred to in the document but does not appear relevant to the focus of this research                                                                                                                                                             |
| <p><b>Policy intent</b></p> <p>Involves an assessment of policy intent drawing on Margaret Whitehead's typology [60]</p>                                                                                                                                                                                                                                                                                                                                                                                                                                                                                                                                                    | Strengthen individuals                               | Statements that reflect the aim of strengthening individuals, using individually focused strategies                                                                                                                                                                  |
|                                                                                                                                                                                                                                                                                                                                                                                                                                                                                                                                                                                                                                                                             | Strengthen communities                               | Statements that reflect the aim of strengthening communities through building social cohesion, capacity within communities, and mutual support between community members                                                                                             |
|                                                                                                                                                                                                                                                                                                                                                                                                                                                                                                                                                                                                                                                                             | Improve living and working conditions                | Statements that reflect the aim of changing the broader social and environmental conditions that people live and work in. This includes both social and physical environments, as well as the economic, cultural, political influences that shape those environments |
|                                                                                                                                                                                                                                                                                                                                                                                                                                                                                                                                                                                                                                                                             | Address socio-economic inequities                    | Statements that reflect an explicit intent to directly change the distribution of resources – rather than to provide once off alms or reactive band aid solutions                                                                                                    |
| <p><b>Collaboration</b></p> <p>Includes references to the importance of intersectoral, private sector, or community</p>                                                                                                                                                                                                                                                                                                                                                                                                                                                                                                                                                     | Collaboration- Intersectoral                         | References to the importance of collaborating within and across the departments/sectors of                                                                                                                                                                           |

| Coding focus                                                               | Nodes/categories                                                | Explanation                                                                                                                                                           |
|----------------------------------------------------------------------------|-----------------------------------------------------------------|-----------------------------------------------------------------------------------------------------------------------------------------------------------------------|
| collaboration.                                                             |                                                                 | governments. Also includes statements about the importance of the different levels of government working together                                                     |
|                                                                            | Collaboration-Private sector involvement                        | References to the importance of collaborating with private sector organisations                                                                                       |
|                                                                            | Collaboration-Community involvement                             | References to the importance of involving/consulting with the community as a whole or sub-groups within the community                                                 |
| <b>Explicit references to key groups and concepts within the documents</b> | Mention of- Aboriginal Australians or Torres Straight Islanders | Any sentence where an explicit reference to Aboriginal Australians or Torres Straight Islanders appears is coded                                                      |
|                                                                            | Mention of- health word                                         | Any sentence where the following word/s is mentioned:<br>Health, wellbeing, fitness, fit, illness, disease, wellness, equity, inequity, equality, inequality is coded |
| <b>Mentions of other related documents</b>                                 | Policy document                                                 | All references to other policies are coded                                                                                                                            |
|                                                                            | Act                                                             | All references to other Acts/legislation are coded                                                                                                                    |
|                                                                            | Other related document                                          | All references to related documents that are mentioned in the policy/Act are coded (e.g. guides/handbooks etc.)                                                       |

1

2

3

### BOX 1: Social determinants of health

4 Segments of text are coded as referring to a social determinant when they reflect a  
5 focus on any of the following:

- **Education** [1, 62, 63]

- **Food** [62, 64]

- **Health systems** [1, 62]
- **Housing** [excludes prisons] [62, 65]
- **Distribution of income** [1]
- **Stigma/discrimination** [based on race/ethnicity or other characteristics] [65]
- **Social relationships** [1, 62]
- **Social exclusion** [65]
- **Transport** [64]
- **Employment** [1, 65]
- **Welfare system** [65]
- **Land/country** [65]
- **Gender** [1]
- **Safety** [66]
- **Culture** [65]
- **Open space**
- **Natural environment** [28]
- **Built environment** [67]
- **Climate change** [28]

1

2

3

#### 4 **Stage 2-Embedded Case studies:**

5 The coding process will identify examples of policies that demonstrate good practice  
6 in addressing SDH/HE. Two such policies will be selected in each of the four  
7 selected sectors (n=8) as embedded case studies. The aim is to understand in  
8 greater depth the factors that enable consideration of SDH/HE during policy  
9 development and to assess whether implementation of the selected policies is  
10 inclusive of efforts that will progress SDH/HE. The embedded case studies will be  
11 framed by a critical realist evaluation approach.

12

13 Critical realist evaluation will allow us to engage beyond the question of whether a  
14 policy proposes work on the SDH/HE. We will examine *why* specific policies have  
15 incorporated SDH/HE, *what* circumstances and conditions made this possible, and  
16 *how* work on SDH/HE is being progressed during policy implementation [40]. If work  
17 on SDH/HE has not formed part of the implementation focus, we will examine what  
18 has impeded this [68], and question which institutional norms and factors, such as  
19 neoliberal values and lifestyle drift, have had an impact. Consistent with the broader  
20 aims of the study, selection of policies for the embedded case studies will include at  
21 least three policies that specifically address the health of Aboriginal and Torres Strait  
22 Islanders.

23

1  
2  
3 1 The embedded case study research will involve analysis of documents associated  
4 2 with each selected policy as well as key policy actor interviews. The interviews will  
5 3 be focussed on examining the factors that enabled SDH/HE to get onto each sector's  
6 4 policy agenda, and on exploring whether implementation has incorporated actions  
7 5 that are likely to progress SDH/HE. The interview schedule will be informed by the  
8 6 work of Kingdon [69], Lewis [70], Bacchi [59], and Hall [71]. As such, the interviews  
9 7 are intended to elicit interviewees' views on the various institutional, political, or  
10 8 conceptual factors, and use of evidence, which influenced the focus and content of  
11 9 the policies, as well as their implementation. Interviewees' views on whether an  
12 10 individualised or social/structural perspective was adopted to define the problem/s to  
13 11 be addressed, or to shape the preferred policy 'solution' to be applied during policy  
14 12 development and implementation, will also be collected during the interviews.  
15  
16  
17  
18  
19  
20  
21  
22  
23

24 14 The processes for interviewee recruitment and case study data analysis are as  
25 15 follows. Senior executives within the departments that developed each selected  
26 16 policy will be consulted to identify a key contact person, who will be asked to assist  
27 17 with identifying a policy network for each case study [70]. Further key actors will be  
28 18 identified by snowball sampling as the embedded case studies progress [39, 55].  
29 19 Between eight and twelve key actors will be interviewed about each of the eight  
30 20 selected policies. They will be individuals who hold, or held at a relevant time, a  
31 21 senior position and have direct experience of the policy's development and/or  
32 22 implementation. This may include departmental staff, ministers or ministerial staff,  
33 23 and advisors from outside government. The policy actors (including politicians, public  
34 24 servants and civil society activists) will be asked to engage in a one hour semi-  
35 25 structured interview to explore their perspectives on the development and/or  
36 26 implementation of the policy, and to identify any documents that illuminate the  
37 27 political/policy context in which the policy has been developed and implemented.  
38 28 Data from the interviews and documents informing the case will be analysed  
39 29 (assisted by NVivo 11) with a coding structure designed to identify how specification  
40 30 of a policy problem, selection of policy options, political and institutional context, and  
41 31 recognition of evidence influenced the content of the policy, and specifically its  
42 32 consideration of SDH/HE during both policy development and implementation. A  
43 33 detailed interrogation of how the policy actors view the issue of lifestyle drift and the  
44  
45  
46  
47  
48  
49  
50  
51  
52  
53  
54  
55  
56  
57  
58  
59  
60

1  
2  
3 1 impact of neoliberalism on contemporary policy contexts will also form part of the  
4 2 analysis process.  
5  
6 3  
7

### 8 4 **Stage 3 – Theoretical integration**

9 5 During Stage 3 social and political science theories will be used to illuminate the  
10 6 operation and implications of the problem definition processes [59], political interests  
11 7 [69] and institutional values and norms (including neoliberalism) [71, 72] that are  
12 8 identified during Stages 1 and 2. This will assist in identifying the political and  
13 9 institutional factors that facilitate, and present barriers to, action on SDH/HE within  
14 10 and between the selected sectors. With Stage 1 data, application of theory will assist  
15 11 in understanding whether or not each sector's policies, as a group, feature particular  
16 12 characteristic values, goals and/or problem conceptions, and in understanding how  
17 13 these may have delimited the objectives and strategies in ways which are favourable  
18 14 or unfavourable to action on SDH/HE. Application of theory to Stage 2 data will  
19 15 facilitate understanding about how policy development processes (involving ideas,  
20 16 structures and actors) are influenced by political and/or institutional factors, including  
21 17 tacit or explicit theories of the nature and causes of the policy problem to be  
22 18 addressed, and how this can best be achieved. Stage 3 will draw all the findings  
23 19 together, with a focus on understanding the themes that emerge consistently across  
24 20 all the four sectors, illuminating the various interconnections.  
25  
26  
27  
28  
29  
30  
31  
32  
33  
34  
35  
36  
37

### 38 22 **Research governance**

39 23 As alluded to previously, the research is being undertaken by a team of researchers  
40 24 with a track record of working together, and within the sectors that have been  
41 25 selected as the primary case studies for this research. The chief investigators are a  
42 26 collaborative group of multi-disciplinary researchers led by a public health social  
43 27 science researcher (FB) and comprising expertise in political philosophy (MF),  
44 28 Indigenous health (DMcD), urban planning and public health (PH), healthy public  
45 29 policy (CM), and economics, political economy and sustainability (DM). Partner  
46 30 investigators bring expertise in the areas of urban planning, public health policy,  
47 31 justice sector structure, processes and impacts, bureaucratic governance,  
48 32 intersectoral collaboration, and environmental sustainability.  
49  
50  
51  
52  
53  
54  
55  
56  
57  
58  
59  
60



1 Continuing regular meetings between the members of the research team throughout  
2 the study will be vital. The meetings include discussion of findings from the coding  
3 and also discussion of broader theoretical meaning. The project manager (TDC) is  
4 co-ordinating the meetings and the data collection and analysis processes.

5  
6 To avoid the emergence of group-think within the project team, and to provide  
7 valuable sectoral insights and encourage policy relevance and translation, a Project  
8 Policy Advisory Group (PPAG) has been formed. Invitees to this group have direct  
9 policy related knowledge and experience from the sectors being examined in this  
10 study. The group includes senior public servants from a number of jurisdictions, non-  
11 government organisations and academic institutions with a record of interest in  
12 public policy action on SDH/HE. It is envisaged that the PPAG will meet six monthly  
13 over the course of the project, and advise the research team on issues in the policy  
14 environment related to the research aims, as well as support dissemination of  
15 outputs. The research team will use the PPAG meetings to test the relevance and  
16 usefulness of the findings. A combination of informal dialogue, formal meetings,  
17 written policy briefings and organised policy symposia will also be used throughout  
18 all stages of the research to gain broader feedback and input on the meaning of the  
19 emerging findings.

20  
21 The intersectoral discussions that occur during the PPAG meetings, as well as the  
22 collective team meetings, will be essential in highlighting the interconnections  
23 between sectors and policy impacts, to ensure that each sector is not studied as a  
24 siloed entity. Interrogation of the interconnections between sectors will facilitate  
25 broader theorisation of the meaning and relevance of the findings during Stage 3 of  
26 the research.

### 27 **Patient and Public Involvement**

28  
29 Due to the nature of the research, patients were not involved in the design of this  
30 study. However, findings will be disseminated to all study participants as described  
31 next.

### 32 **Ethics and dissemination**

33

1  
2  
3 1 The research will provide policy-ready evidence on good practices on SDH/HE that  
4 2 is relevant to multiple sectors. Such evidence may be useful in influencing current  
5 3 policy development and implementation practices, increasing the likelihood that  
6 4 future policies will be more coherent, forming part of a whole-of-government  
7 5 approach to reduce adverse health impacts, promote wellbeing and achieve  
8 6 beneficial flow-on effects in all sectors. A range of dissemination strategies will be  
9 7 used to ensure that learnings can be shared effectively with academic and policy  
10 8 audiences. These will include the regular sharing of findings during the PPAG  
11 9 meetings, the release of policy briefings to all jurisdictions (including direct  
12 10 dissemination to all interview participants), the publication of academic papers and  
13 11 conference presentations. An initial research symposium has already been held to  
14 12 share research plans and background information on this area. Another symposium  
15 13 will be held at the conclusion of the project to share findings. Ethics approval has  
16 14 already been secured to allow the embedded case study research to proceed.  
17 15 However, once policies from the justice sector have been selected, additional ethics  
18 16 clearance may be required to allow interviewing of departmental staff.

#### 17 18 Practical and operational issues

19 The focus on four sectors means that the research is inherently interdisciplinary.  
20 While this is a strength of the design, achieving true interdisciplinarity requires the  
21 researchers to deal with practical issues. For example, the researchers will need to  
22 review, understand and apply perspectives from the urban planning, justice, energy  
23 and environment sectors as well as from the field of public health. Journal publishing  
24 word limits, as well as the scope and disciplinary boundaries of journals, will make  
25 this task difficult. To overcome these issues, it is likely that publication efforts will be  
26 aimed at carefully selected journals with the appropriate scope and disciplinary  
27 focus. We plan to combine overviews of all findings with papers dealing more deeply  
28 with literature and research findings from each sector. Furthermore, the  
29 interdisciplinary research focus will require the researchers to engage with all policy  
30 departments that are connected to the four sectors across all nine jurisdictions of  
31 government (federal as well as all state/territory governments in Australia).

32  
33 Forming strong connections with policy actors on the PPAG will be central to this.  
34 However, not all departments are represented on the PPAG, so the researchers will

1  
2  
3 1 need to devise strategies for connecting with the broader policy network in ways that  
4 2 satisfy the requirements of truly collaborative research, but that also ensure  
5 3 efficiency. One strategy will be forming relationships with policy staff in some  
6 4 relevant departments during the embedded case studies. Contact with a broader  
7 5 policy network will also be ensured by the researchers consulting all relevant  
8 6 departments to seek feedback on the findings of Stage 1 via the policy briefings, and  
9 7 by inviting staff from all relevant departments to research forums that will be  
10 8 livestreamed to encourage broad geographical participation.  
11  
12  
13  
14  
15  
16  
17  
18

19 9  
20 10 The research also involves considerable conceptual complexity. Complexity is  
21 11 associated, in particular, with the relevance of critiquing pervasive, dominant social  
22 12 ideologies that shape current norms and influence the subsequent definition of policy  
23 13 problems and appropriate responses. Articulating neoliberalism will not be easy  
24 14 because its influence on policy is likely to be far reaching and not always easily  
25 15 detectable in individual policy documents. The research team will establish and  
26 16 reflect on coding processes to understand the nuances and impacts of institutional  
27 17 factors, including neoliberalism. Thus researchers will record their reflections in the  
28 18 document and jurisdiction summaries during Stage 1 to broaden focus from the  
29 19 specific coding categories to thinking about the ideological orientations of each  
30 20 document, how policy problems are being framed and what the dominant focus in  
31 21 each document/sector is. Research team meetings include critical discussions about  
32 22 the ideological underpinning of the key findings that are emerging, allowing  
33 23 discussion about the relationships between key themes and the broader ideologies  
34 24 that permeate thinking and action in each sector and jurisdiction.  
35  
36  
37  
38  
39  
40  
41  
42

43 25  
44 26 Detecting lifestyle drift will be facilitated by the researchers comparing the goals,  
45 27 objectives and strategies articulated in each document, to determine the extent to  
46 28 which broad statements of intent to tackle SDH/E are either implemented, or instead  
47 29 diverted into actions focused on changing the behaviours of individuals.  
48  
49  
50

51 30  
52 31 Researchers will be attentive to the concept of policy silences. The coding process  
53 32 will identify not only what content exists within the policies, but also stimulate thinking  
54 33 about alternative problem definitions and unaddressed aspects of policy topics.  
55 34 Examining silences will render visible how neoliberalism and lifestyle drift may be  
56  
57  
58  
59  
60

1  
2  
3 1 pushing policy in particular directions, while keeping alternative problem definitions  
4 2 off the policy agenda.  
5  
6 3  
7  
8 4 Importantly, advocates for healthy public policy have called for cross-sectoral action  
9 5 to harness the opportunities that arise from greater understanding of how  
10 6 interconnections between policy areas affect health and equity. Yet as alluded to  
11 7 earlier, most intersectoral action has been limited to extending health sector medical  
12 8 and behavioural programs into other social policy sectors [25]. This can intensify a  
13 9 narrow focus on individuals rather than populations, and avoid interventions  
14 10 designed to tackle SDH/HE. For example, cross-sectoral collaboration between the  
15 11 justice and health sectors has been shown to be limited to prisoner assessment and  
16 12 improving access to remedial health care for people already in prison [25]. The focus  
17 13 on assessment and health care for prisoners, while important, is unlikely to prevent  
18 14 incarceration or to address the underlying social, cultural and economic factors that  
19 15 perpetuate the cycle of incarceration. This research will, therefore, focus on making  
20 16 clear how policies in our selected sectors can, in their own right, act to both promote  
21 17 health and prevent threats to health thus tackling the social determinants at their  
22 18 roots. Our publications will engage with theory and use the advice of policy makers  
23 19 to recommend how our case study sectors could form partnerships with the health  
24 20 sector that do address the roots of SDH/HE and avoid lifestyle drift.  
25  
26  
27  
28  
29  
30  
31  
32  
33  
34

35 21  
36  
37 22 Ensuring rigour during the coding process is vital, particularly in light of the  
38 23 challenges associated with the project, such as the conceptual complexity of the  
39 24 research focus, the large number of policy documents and the need to distribute  
40 25 coding tasks between multiple researchers. Strategies to ensure rigour will include  
41 26 collaborative coding of policy documents to check consistency of approach, regular  
42 27 discussion of coding summaries to ensure appropriate depth of analysis, and regular  
43 28 meetings between coders to discuss areas of uncertainty and to develop mutually  
44 29 agreed solutions to coding difficulties. A detailed coding guide has already been  
45 30 developed by the research team and is in use. This guide directs the coders to follow  
46 31 a consistent approach to the analysis and reminds them of the areas they need to be  
47 32 attentive to. Importantly the guide defines the concepts used in the coding  
48 33 framework. The application of consistent understandings during the coding process  
49 34 is imperative to achieving a consistent and transparent analytical focus.  
50  
51  
52  
53  
54  
55  
56  
57  
58  
59  
60

## 2 **Limitations of the research**

3 While this research is important, and necessarily ambitious, some limitations are  
4 evident. As explained earlier, a strength of the research is that a census of all  
5 relevant policies will be included in the study. This will allow us to develop a  
6 comprehensive view of the policy landscape across and within the four sectors.  
7 Given that the policy landscape is so dynamic (reflecting its political roots), we are  
8 conscious that the landscape will be changing even as we conduct the research.  
9 Because data collection is bounded by set time periods we will not be able to include  
10 new documents as they are released, or as political events change policy direction.  
11 However, to ensure that the policy analysis is rigorous, and remains manageable, it  
12 is vital that we apply transparent, time bound criteria for document collection. This  
13 demonstrates, in action, the clash between the research world (in which detailed  
14 analysis takes time) and the policy world (which changes rapidly in the face of  
15 bureaucratic and political flux).

16  
17 The four sectors will be studied within a federated system. Australia has three levels  
18 of government: federal, state and territory, and local. Our focus is on policies from  
19 the first two levels. Local government has been excluded to ensure that the project  
20 scope remains manageable.

21  
22 Furthermore, the design of the study will not allow direct evaluation of the population  
23 health impacts of policy interventions. Instead, our ability to theorise causal links  
24 between policy implementation and improvements in SDH/HE will be based on our  
25 analysis of published literature.

## 27 **Summary of the research significance**

28 This research will develop and test a protocol that can be applied across all policy  
29 sectors to understand the potential impact of their proposed actions on SDH/HE. The  
30 research findings that are produced through this study will enhance Australia's  
31 knowledge base and research capability in understanding the crucial and complex  
32 intersections between public policy (divided into policy sectors carrying out different  
33 functions) and work to progress the SDH/HE. This is important since optimised,

1 systemic action on SDH/HE has significant potential to reduce public spending in a  
2 number of policy sectors, as well as to contribute to improved economic productivity  
3 and disease prevention [17].

4  
5 There has been significant, recent recognition in Australia's federal parliament of a  
6 need for more coherent action on SDH/HE across policy sectors and levels of  
7 government [24]; including specifically in relation to Aboriginal and Torres Strait  
8 Islander health [14, 73]. This research will provide evidence to policy makers about  
9 opportunities to improve the engagement of all policy sectors in ways that have the  
10 potential to reduce health costs and contribute to closing the health gap between  
11 Indigenous and non-Indigenous Australians. Overall, the research will provide much  
12 needed evidence on concrete ways in which coherent whole-of-government action  
13 on SDH/HE can be advanced in Australia to enhance wellbeing and address health  
14 inequities [74].

## 16 **Abbreviations**

17 ARC- Australian Research Council

18 SDH/HE- Social determinants of health and health equity

19 WHO- World Health Organisation

20 OECD- Organisation for Economic Co-operation and Development

21 PPAG- Project Policy Advisory Group

## 23 **Declarations**

### 24 **Ethics approval and consent to participate**

25 This research project has been approved by the Flinders University Social and  
26 Behavioural Research Ethics Committee (Project Number 7176).

### 27 **Competing interests**

28 The authors declare that they have no competing interests.

### 29 **Funding**

30 This work is supported by the Australian Research Council (ARC) (Grant:  
31 DP160100244) between 2016 and 2019. The ARC has no role in data collection,

1  
2  
3 1 analysis or interpretation. This protocol was peer-reviewed by the funding body prior  
4 2 to funding being awarded.  
5  
6  
7  
8  
9  
10

11 6 **Figure legends**

12  
13 7 Figure 1 presents an overview of the research design, showing how the Stage one  
14 8 document analysis leads to the Stage 2 embedded case studies.  
15  
16  
17

18 10 Figure 2 shows the successive stages of the research, including the policy analysis, the  
19 11 embedded case studies and the process of theoretical integration.  
20  
21  
22  
23  
24  
25  
26  
27  
28  
29  
30  
31  
32  
33  
34  
35  
36  
37  
38  
39  
40  
41  
42  
43  
44  
45  
46  
47  
48  
49  
50  
51  
52  
53  
54  
55  
56  
57  
58  
59  
60



## References

1. Commission on the Social Determinants of Health: **Closing the gap in a generation: Health equity through action on the social determinants of health**. Geneva: World Health Organization; 2008.
2. Australian Institute of Health and Welfare: **Australia's Health 2014**. Canberra: Australian Government, AIHW; 2014.
3. Australian Institute of Health and Welfare: **Life expectancy**; 2017.
4. Baum F: **The New Public Health (4th Edition)**, 3rd edn. Melbourne: Oxford University Press; 2015.
5. Australian Institute of Health and Welfare: **Australia's health 2010**. Canberra: Australian Government, Australian Institute of Health and Welfare; 2010.
6. Fisher M, Baum F, MacDougall C, Newman L, McDermott D: **To what extent do Australian health policy documents address social determinants of health and health equity?** . *Journal of Social Policy* 2016, 45 (3):545-564.
7. Fisher M, Baum F, MacDougall C, Newman L, McDermott D: **A qualitative methodological framework to assess uptake of evidence on SDH in health policy**. *Evidence & Policy* 2015, 11( 4): 491-507.
8. Fisher M, Baum FE, MacDougall C, Newman L, McDermott D, Phillips C: **Intersectoral action on SDH and equity in Australian health policy**. *Health promotion international* 2017, 32 (6): 953-963.
9. Hetzel D, Page A, Glover J, Tennant S: **Inequality in South Australia: Key determinants of wellbeing. Volume 1: the evidence**. Adelaide: SA Department of Health; 2004.
10. Marmot M: **Social determinants and the health of Indigenous Australians**. *Medical Journal of Australia* 2011, 194(10): 512-513.
11. Marmot M, Allen J, Goldblatt P, Boyce T, McNeish D, Grady M, Geddes I: **Fair society, healthy lives, the Marmot review, executive summary: Strategic review of health inequalities in England post-2010**. London: U.K. Department of Health; 2010.
12. Marmot M, Friel S: **Global health equity: Evidence for action on the social determinants of health**. *Journal of Epidemiology & Community Health* 2008, 62:1095-1097.
13. United Nations General Assembly: **Political declaration of the high-level Meeting of the General Assembly on the prevention and control of non-communicable diseases**. New York: United Nations; 2012.
14. Australian Government: **National Aboriginal and Torres Strait Islander Health Plan 2013–2023**. Canberra: Commonwealth of Australia; 2013.
15. Commonwealth Department of Health and Aged Care: **The influences on mental health**. In: *Promotion, prevention and early intervention for mental health: A monograph*. edn. Canberra: Mental Health and Special Programs Branch: Commonwealth Department of Health and Aged Care; 2000.
16. Whitehead M: **The concepts and principles of equity and health**. *International journal of health services* 1992, 22(3):429-445.
17. Brown L, Thurecht L, Nepal B: **The cost of inaction on the social determinants of health**. Canberra, ACT: NATSEM; 2012.
18. Kickbusch I, Buckett K (eds.): **Implementing Health in All Policies: Adelaide 2010**. Adelaide: Department of Health, Government of South Australia; 2010.
19. Baum F, Fisher M, Lawless A: **Australian Experiences**. In: *Tackling Health Inequalities; Lessons from international experiences*. edn. Edited by Raphael D. Toronto: Canadian Scholars Press; 2012.
20. Bryant T, Raphael D, Schrecker T, Labonte R: **Canada: A land of missed opportunity for addressing the social determinants of health**. *Health Policy* 2011, 101(1):44-58.

- 1  
2  
3 1 21. Newman L, Baum F, Harris E: **Federal, state and territory government responses to health inequities and the social determinants of health in Australia.** *Australian Journal of Health Promotion* 2006, 17(3):217-225.
- 4 2  
5 3  
6 4 22. UCL Institute of Health Equity: **Review of social determinants and the health divide in the WHO European Region: Final report.** Copenhagen: World Health Organization Regional Office for Europe; 2013.
- 7 5  
8 6  
9 7 23. World Conference on Social Determinants of Health: **Rio Political Declaration on Social Determinants of Health.** Rio de Janeiro, Brazil, 21 October 2011: World Health Organization; 2011.
- 10 8  
11 9  
12 10 24. Senate Community Affairs Reference Committee: **Australia's domestic response to the World Health Organisation's (WHO) Commission on Social Determinants of Health report "Closing the gap within a generation".** Canberra: Commonwealth of Australia; 2013.
- 13 11  
14 12  
15 13  
16 14 25. Fisher M, Baum F, MacDougall C, Newman L, McDermott D: **Cross-sectoral action on SDH in Australian health policy: Are we getting there?** Sydney, University of NSW; 2014.
- 17 15  
18 16  
19 17 26. Krieg AS: **Aboriginal incarceration: Health and social impacts.** *Medical Journal of Australia* 2006, 184(10):534-536.
- 20 18  
21 19 27. Friel S, GRNUHE (eds.): **Improving urban health equity through action on the social and environmental determinants of health: Final Report of the GRNUHE.** London: University College London, The Rockefeller Foundation; 2010.
- 22 20  
23 21  
24 22 28. Galvão LA, Edwards S, Corvalan C, Fortune K, Akerman M: **Climate change and social determinants of health: two interlinked agendas.** *Global health promotion* 2009, Suppl 1:81-84.
- 25 23  
26 24  
27 25 29. Australian Council of Trade Unions: **Insecure work, anxious lives: The growing crisis of insecure work in Australia.** Melbourne: ACTU; 2011.
- 28 26  
29 27 30. McRae T, Webster P, Marinova D: **Australia's low-carbon economy and Indigenous people.** *Transformations* 2015, 3(4): 253-265.
- 30 28  
31 29 31. Anderson I, Baum F, Bentley M (eds.): **Beyond band-aids: Exploring the underlying social determinants of Aboriginal Health. Papers from the Social Determinants of Aboriginal Health Workshop, Adelaide, July 2004.** Darwin: Cooperative Research Centre for Aboriginal Health; 2007.
- 32 30  
33 31  
34 32  
35 33 32. Campbell D, Burgess CP, Garnett ST, Wakerman J: **Potential primary health care savings for chronic disease care associated with Australian Aboriginal involvement in land management.** *Health Policy* 2011, 99(1):83-89.
- 36 34  
37 35  
38 36 33. Osborne K, Baum F, Brown L: **What works? A review of actions addressing the social and economic determinants of Indigenous health:** Australian Institute of Health and Welfare, Australian Institute of Family Studies; 2013.
- 39 37  
40 38  
41 39 34. Justice Centre: The Council of State Governments: **Justice Reinvestment in North Carolina: Three years later.** Washington DC: TCSG; 2014.
- 42 40  
43 41 35. Howard D, Quinn S, Blokland J, Flynn M: **Aboriginal hearing loss and the criminal justice system.** *Aboriginal Law Bulletin* 1993, 3(65).
- 44 42  
45 43 36. Howlett M, Ramesh M, Perl A: **Studying public policy: Policy cycles and policy subsystems.** Toronto: Oxford University Press; 2009.
- 46 44  
47 45 37. Aronowitz S: **Introduction.** In: *Critical Theory: Selected Essays.* edn. Edited by M Horkheimer. New York: The Continuum Publishing Company; 2002: xi-xxi.
- 48 46  
49 47 38. Lather P: **Critical Inquiry in Qualitative Research: Feminist and Poststructural Perspectives: Science "After Truth".** In: *Foundations for Research: Methods of Inquiry in Education and the Social Sciences.* edn. Edited by Marraiss Kd, Lapan S. New Jersey: Lawrence Erlbaum Publishers; 2004: 203-215.
- 50 48  
51 49  
52 50 39. Crotty M: **The foundations of social research: Meaning and perspective in the research process:** Sage; 1998.
- 53 52  
54 53 40. Danermark B, Ekstrom M, Jakobsen L: **Explaining society: Critical realism in the social sciences.** London: Routledge; 2002.
- 55 53  
56 54  
57  
58  
59  
60

- 1  
2  
3 1 41. Miller C, Orchard L: **Chapter 1: Towards a new progressive policy agenda.** In:  
4 2 *Australian Public Policy: Progressive Ideas in the Neoliberal Ascendancy.* edn.  
5 3 Edited by Miller C, Orchard L. Bristol: Policy Press; 2014: 3-26.
- 6 4 42. Davis M: **Chapter 2: Neoliberalism, the culture wars and public policy.** In:  
7 5 *Australian public policy: Progressive ideas in the neoliberal ascendancy.* edn. Edited  
8 6 by Miller C, Orchard L. Bristol: Policy Press; 2014: 27-42.
- 9 7 43. Rose N: **Governing “advanced” liberal democracies.** In *The anthropology of the*  
10 8 *state: A reader* 1996: 37-64.
- 11 9 44. Galvin R: **Disturbing notions of chronic illness and individual responsibility:**  
12 10 **Towards a genealogy of morals.** *Health* 2002, 6(2):107-137.
- 13 11 45. Cockerham WC: **Health Lifestyle Theory and the Convergence of Agency and**  
14 12 **Structure.** *Journal of Health and Social Behavior* 2005, 46(1):51-67.
- 15 13 46. Tesh SN: **Hidden arguments: Political ideology and disease prevention policy:**  
16 14 Rutgers University Press; 1988.
- 17 15 47. Carter SM, Hooker LC, Davey HM: **Writing social determinants into and out of**  
18 16 **cancer control: An assessment of policy practice.** *Social Science & Medicine*  
19 17 2009, 68(8):1448-1455.
- 20 18 48. Fisher M, Baum F, MacDougall C, Newman L, McDermott D: **Australian health**  
21 19 **policy and social determinants of health and equity: A review of policy content.**  
22 20 Sydney, University of NSW; 2013.
- 23 21 49. Fisher M, Baum FE, MacDougall C, Newman L, McDermott D: **To what Extent do**  
24 22 **Australian Health Policy Documents address Social Determinants of Health**  
25 23 **and Health Equity?** *Journal of Social Policy* 2016, 45 (3):545-564.
- 26 24 50. Tesh S: **Hidden Arguments: Political Ideology and Disease Prevention Policy.**  
27 25 New Brunswick, NJ: Rutgers University Press; 1988.
- 28 26 51. Baum F, Fisher M: **Why behavioural health promotion endures despite its failure**  
29 27 **to reduce health inequities.** *Sociology of Health and Illness* 2014, 36(2):213-225.
- 30 28 52. Hastings G: **Why corporate power is a public health priority.** *British Medical*  
31 29 *Journal* 2012, 345:e5124.
- 32 30 53. Freudenberg N: **Lethal but legal: Corporations, consumption and protecting**  
33 31 **public health.** New York: Oxford University Press 2014.
- 34 32 54. Yin RK: **Case study research: Design and methods:** Sage publications; 2013.
- 35 33 55. Liamputtong P, Ezzy D: **Qualitative Research Methods,** 2nd edn. Melbourne,  
36 34 Australia: Oxford University Press; 2006.
- 37 35 56. Corbin J, Strauss A: **Basics of qualitative research.** California: Sage Publications;  
38 36 2008.
- 39 37 57. Bowen GA: **Document analysis as a qualitative research method.** *Qualitative*  
40 38 *Research Journal* 2009, 9(2):27-40.
- 41 39 58. Bacchi CL: **Women, policy and politics: The construction of policy problems:**  
42 40 Sage; 1999.
- 43 41 59. Bacchi C: **Analysing policy: What's the problem represented to be?** Frenchs  
44 42 Forest, NSW: Pearson Education; 2009.
- 45 43 60. Whitehead M: **A typology of actions to tackle social inequalities in health.**  
46 44 *Journal of Epidemiology and Community Health* 2007, 61(6):473-478.
- 47 45 61. Lackey RT: **Values, Policy, and Ecosystem Health Options for resolving the**  
48 46 **many ecological policy issues we face depend on the concept of ecosystem**  
49 47 **health, but ecosystem health is based on controversial, value-based**  
50 48 **assumptions that masquerade as science.** *BioScience* 2001, 51(6):437-443.
- 51 49 62. Dahlgren G, Whitehead M: **Policies and strategies to promote equity in health.**  
52 50 Copenhagen: World Health Organization, Regional Office for Europe; 1992.
- 53 51 63. Solar O, Irwin A: **A conceptual framework for action on the social determinants**  
54 52 **of health: Social determinants of health discussion paper 2:** WHO; 2010.
- 55 53 64. Wilkinson RG, Marmot MG: **Social determinants of health: the solid facts:** World  
56 54 Health Organization; 2003.

- 1  
2  
3 1 65. Carson B, Dunbar T, Chenhall RD, Bailie R: **Social determinants of Indigenous health**: Allen & Unwin; 2007.
- 4 2  
5 3 66. USDH (US Department of Health Office of Disease Prevention): **Healthy people 2020**; 2010. <https://www.healthypeople.gov/>, Accessed on 16 September 2017.
- 6 4  
7 5 67. Northridge ME, Sclar ED, Biswas MP: **Sorting out the connections between the built environment and health: a conceptual framework for navigating pathways and planning healthy cities**. *Journal of Urban Health* 2003, 80(4):556-568.
- 8 6  
9 7  
10 8 68. Sayer A: **Realism and social science**: Sage, London, 2000.
- 11 9 69. Kingdon J: **Agendas, Alternatives and Public Policies**, 2 edn. New York: Addison-Wesley Educational Publishers; 2011.
- 12 10  
13 11 70. Lewis JM: **Health Policy and Politics: Networks, Ideas and Power**. Melbourne: IP Communications; 2005.
- 14 12  
15 13 71. Hall PA: **Policy paradigms, social learning, and the state: The case of economic policymaking in Britain**. *Comparative Politics* 1993, 25(3):275-296.
- 16 14  
17 15 72. Thelen K: **Historical institutionalism in comparative politics**. *Annual Review in Political Science* 1999, 2:369-404.
- 18 16  
19 17 73. National Congress of Australia's First Peoples: **Submission on the National Aboriginal and Torres Strait Islander Health Plan**. Canberra: NCAFP; 2013.
- 20 18  
21 19 74. Leigh A: **Battlers and billionaires: The story of inequality in Australia**. Melbourne: Black Inc; 2013.
- 22 20  
23 21  
24  
25  
26  
27  
28  
29  
30  
31  
32  
33  
34  
35  
36  
37  
38  
39  
40  
41  
42  
43  
44  
45  
46  
47  
48  
49  
50  
51  
52  
53  
54  
55  
56  
57  
58  
59  
60

1  
2  
3  
4  
5  
6  
7  
8  
9  
10  
11  
12  
13  
14  
15  
16  
17  
18  
19  
20  
21  
22  
23  
24  
25  
26  
27  
28  
29  
30  
31  
32  
33  
34  
35  
36  
37  
38  
39  
40  
41  
42  
43  
44  
45  
46  
47  
48  
49  
50  
51  
52  
53  
54  
55  
56  
57  
58  
59  
60



147x207mm (300 x 300 DPI)

1  
2  
3  
4  
5  
6  
7  
8  
9  
10  
11  
12  
13  
14  
15  
16  
17  
18  
19  
20  
21  
22  
23  
24  
25  
26  
27  
28  
29  
30  
31  
32  
33  
34  
35  
36  
37  
38  
39  
40  
41  
42  
43  
44  
45  
46  
47  
48  
49  
50  
51  
52  
53  
54  
55  
56  
57  
58  
59  
60

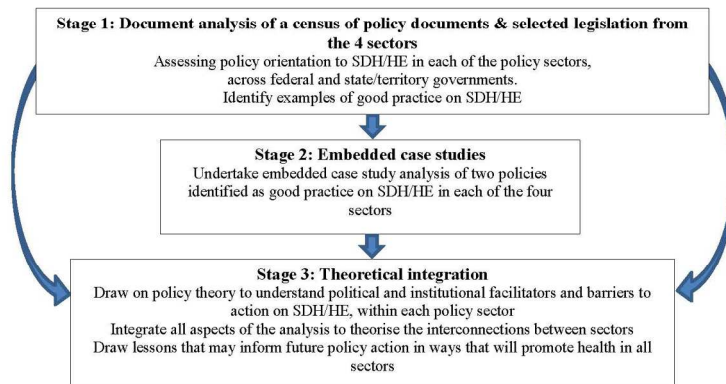

140x198mm (300 x 300 DPI)
