# Supplementary material for: Qualitative protocol for understanding the contribution of Australian policy in the urban planning, justice, energy and environment sectors to promoting health and health equity
Source: PubMed Central journal article supplement — BMJ Open. 2018 Oct 4;8(9):e025358. doi: 10.1136/bmjopen-2018-025358 (PMC6173260; doi:10.1136/bmjopen-2018-025358), 2018-10-04
Supplement: bmjopen-2018-025358.reviewer_comments.pdf [file bmjopen-2018-025358.reviewer_comments.pdf]

## PEER REVIEW HISTORY

BMJ Open publishes all reviews undertaken for accepted manuscripts. Reviewers are asked to complete a checklist review form (<http://bmjopen.bmj.com/site/about/resources/checklist.pdf>) and are provided with free text boxes to elaborate on their assessment. These free text comments are reproduced below.

## ARTICLE DETAILS

|                            |                                                                                                                                                                                     |
|----------------------------|-------------------------------------------------------------------------------------------------------------------------------------------------------------------------------------|
| <b>TITLE (PROVISIONAL)</b> | A qualitative protocol for understanding the contribution of Australian policy in the urban planning, justice, energy and environment sectors to promoting health and health equity |
| <b>AUTHORS</b>             | Baum, Fran; Fisher, Delany-Crowe, Toni; Matthew; Macdougall, C; Harris, Patrick; McDermott, Dennis; Marinova, Dora                                                                  |

This article was not externally reviewed at BMJ Open. Protocols that have been independently assessed prior to submission to BMJ Open are usually fast-tracked to publication on the grounds that further substantial changes will not be possible. This independent assessment will usually be external, independent review for both a substantial grant award from a non-commercial or government funder and ethics approval.
